# Supplementary material for: Identification of circularRNAs and their targets in Gossypium under Verticillium wilt stress based on RNA-seq
Source: PeerJ. 2018 Mar 16;6:e4500. doi: 10.7717/peerj.4500 (PMC5858604; doi:10.7717/peerj.4500)
Supplement: Table S2 [file peerj-06-4500-s002.xls]

## Sheet: Sheet1
circRNA_id	Forward primer	Reverse primer	Length of PCR product
ghi_circ_000330	ACCGACTTGGGTCCTGATTT	CTGTAAAAGTACAAGCAATTTGC	201 bp
ghi_circ_000535	GGATGGAGACCCTCCATTACAGT	AGACCGATCCGATAATACGAC	237 bp
ghi_circ_000555	AAGTTTATGGCTCTGCTTCACGT	GTCAATGATGGTGCGTATGA	448 bp
