# Supplementary material for: Identification of circularRNAs and their targets in Gossypium under Verticillium wilt stress based on RNA-seq
Source: PeerJ. 2018 Mar 16;6:e4500. doi: 10.7717/peerj.4500 (PMC5858604; doi:10.7717/peerj.4500)
Supplement: Table S4 [file peerj-06-4500-s004.xls]

## Sheet: Sheet1
source gene id	annotation	gene family
Gh_A01G0125	LRR and NB-ARC domains-containing disease resistance protein	NBS
Gh_A05G2547	LRR and NB-ARC domains-containing disease resistance protein	NBS
Gh_A06G1626	LRR and NB-ARC domains-containing disease resistance protein	NBS
Gh_A06G1628	LRR and NB-ARC domains-containing disease resistance protein	NBS
Gh_A06G1686	Disease resistance protein (CC-NBS-LRR class) family	NBS
Gh_A11G2680	disease resistance protein (TIR-NBS-LRR class), putative	NBS
Gh_A11G2684	disease resistance protein (TIR-NBS-LRR class), putative	NBS
Gh_D01G0335	NB-ARC domain-containing disease resistance protein	NBS
Gh_D02G0093	Disease resistance protein (TIR-NBS-LRR class) family	NBS
Gh_D03G1527	LRR and NB-ARC domains-containing disease resistance protein	NBS
Gh_D05G3257	NB-ARC domain-containing disease resistance protein	NBS
Gh_D05G3336	NB-ARC domain-containing disease resistance protein	NBS
Gh_D10G2263	NB-ARC domain-containing disease resistance protein	NBS
Gh_D10G2281	NB-ARC domain-containing disease resistance protein	NBS
Gh_D10G2325	LRR and NB-ARC domains-containing disease resistance protein	NBS
Gh_D10G2346	disease resistance protein (TIR-NBS-LRR class), putative	NBS
Gh_D10G2422	NB-ARC domain-containing disease resistance protein	NBS
Gh_D11G2672	NB-ARC domain-containing disease resistance protein	NBS
Gh_D11G3107	NB-ARC domain-containing disease resistance protein	NBS
Gh_D11G3108	NB-ARC domain-containing disease resistance protein	NBS
Gh_A06G0030	Chaperone protein htpG family protein
Gh_A06G0031	Chaperone protein htpG family protein
Gh_D04G0853	Aha1 domain-containing protein
Gh_A08G1745	ascorbate peroxidase 2
Gh_A08G0693	senescence-associated gene 21
Gh_D04G1458	MLP-like protein 34
Gh_D02G1447	MLP-like protein 28
Gh_A08G0219	heat shock protein 81-3
Gh_A05G1984	electron carriers;protein disulfide oxidoreductases
Gh_A06G1711	HEAT repeat ;WD domain, G-beta repeat protein protein
Gh_D13G0686	Rad23 UV excision repair protein family
Gh_D06G0551	RAN GTPase 3
Gh_A04G0217	DNA repair and meiosis protein (Mre11)
Gh_A13G0043	Cysteine/Histidine-rich C1 domain family protein
