# Supplementary material for: Identification of circularRNAs and their targets in Gossypium under Verticillium wilt stress based on RNA-seq
Source: PeerJ. 2018 Mar 16;6:e4500. doi: 10.7717/peerj.4500 (PMC5858604; doi:10.7717/peerj.4500)
Supplement: Table S8 [file peerj-06-4500-s008.xls]

## Sheet: Sheet1
circRNAs existing in the all 8 samples		circRNAs only existing in C-RRI	circRNAs only existing in C-RRM	circRNAs only existing in C-RSI	circRNAs only existing in C-RSM		circRNAs only existing in C-SRI	circRNAs only existing in C-SRM	circRNAs only existing in C-SSI	circRNAs only existing in C-SSM
ghi_circ_000001		ghi_circ_000145	ghi_circ_000067	ghi_circ_000066	ghi_circ_000061		ghi_circ_000203	ghi_circ_000135	ghi_circ_000019	ghi_circ_000232
ghi_circ_000002		ghi_circ_000159	ghi_circ_000143	ghi_circ_000090	ghi_circ_000065		ghi_circ_000210	ghi_circ_000204	ghi_circ_000020	ghi_circ_000293
ghi_circ_000003		ghi_circ_000226	ghi_circ_000404	ghi_circ_000230	ghi_circ_000296		ghi_circ_000353	ghi_circ_000409	ghi_circ_000046	ghi_circ_000364
ghi_circ_000004		ghi_circ_000255	ghi_circ_000490	ghi_circ_000243			ghi_circ_000379	ghi_circ_000590	ghi_circ_000076	ghi_circ_000366
ghi_circ_000005		ghi_circ_000262		ghi_circ_000244			ghi_circ_000462		ghi_circ_000103	ghi_circ_000392
ghi_circ_000007		ghi_circ_000504		ghi_circ_000477			ghi_circ_000586		ghi_circ_000147	ghi_circ_000393
ghi_circ_000009		ghi_circ_000659		ghi_circ_000478					ghi_circ_000217	ghi_circ_000412
ghi_circ_000010				ghi_circ_000514					ghi_circ_000281	ghi_circ_000486
ghi_circ_000013				ghi_circ_000600					ghi_circ_000310	ghi_circ_000574
ghi_circ_000015									ghi_circ_000463
ghi_circ_000016									ghi_circ_000666
ghi_circ_000024
ghi_circ_000025
ghi_circ_000026
ghi_circ_000027
ghi_circ_000030
ghi_circ_000032
ghi_circ_000033
ghi_circ_000035
ghi_circ_000039
ghi_circ_000040
ghi_circ_000041
ghi_circ_000042
ghi_circ_000045
ghi_circ_000047
ghi_circ_000048
ghi_circ_000049
ghi_circ_000054
ghi_circ_000056
ghi_circ_000057
ghi_circ_000058
ghi_circ_000059
ghi_circ_000070
ghi_circ_000073
ghi_circ_000074
ghi_circ_000078
ghi_circ_000081
ghi_circ_000082
ghi_circ_000084
ghi_circ_000085
ghi_circ_000091
ghi_circ_000092
ghi_circ_000095
ghi_circ_000096
ghi_circ_000099
ghi_circ_000100
ghi_circ_000102
ghi_circ_000104
ghi_circ_000106
ghi_circ_000110
ghi_circ_0001
ghi_circ_000114
ghi_circ_000115
ghi_circ_000116
ghi_circ_000117
ghi_circ_000118
ghi_circ_000119
ghi_circ_000120
ghi_circ_000121
ghi_circ_000125
ghi_circ_000127
ghi_circ_000128
ghi_circ_000129
ghi_circ_000131
ghi_circ_000132
ghi_circ_000133
ghi_circ_000137
ghi_circ_000138
ghi_circ_000140
ghi_circ_000148
ghi_circ_000149
ghi_circ_000150
ghi_circ_000152
ghi_circ_000157
ghi_circ_000158
ghi_circ_000160
ghi_circ_000161
ghi_circ_000163
ghi_circ_000164
ghi_circ_000166
ghi_circ_000170
ghi_circ_000172
ghi_circ_000174
ghi_circ_000176
ghi_circ_000177
ghi_circ_000179
ghi_circ_000180
ghi_circ_000181
ghi_circ_000183
ghi_circ_000185
ghi_circ_000187
ghi_circ_000188
ghi_circ_000189
ghi_circ_000191
ghi_circ_000192
ghi_circ_000194
ghi_circ_000196
ghi_circ_000197
ghi_circ_000199
ghi_circ_000201
ghi_circ_000206
ghi_circ_000207
ghi_circ_000208
ghi_circ_000209
ghi_circ_000212
ghi_circ_000214
ghi_circ_000215
ghi_circ_000221
ghi_circ_000223
ghi_circ_000224
ghi_circ_000227
ghi_circ_000246
ghi_circ_000250
ghi_circ_000251
ghi_circ_000252
ghi_circ_000253
ghi_circ_000256
ghi_circ_000260
ghi_circ_000261
ghi_circ_000267
ghi_circ_000268
ghi_circ_000273
ghi_circ_000275
ghi_circ_000276
ghi_circ_000277
ghi_circ_000278
ghi_circ_000279
ghi_circ_000280
ghi_circ_000281
ghi_circ_000282
ghi_circ_000283
ghi_circ_000284
ghi_circ_000288
ghi_circ_000289
ghi_circ_000290
ghi_circ_000291
ghi_circ_000292
ghi_circ_000294
ghi_circ_000297
ghi_circ_000299
ghi_circ_000300
ghi_circ_000303
ghi_circ_000305
ghi_circ_000306
ghi_circ_000307
ghi_circ_000308
ghi_circ_000309
ghi_circ_000312
ghi_circ_000317
ghi_circ_000318
ghi_circ_000324
ghi_circ_000325
ghi_circ_000334
ghi_circ_000337
ghi_circ_000338
ghi_circ_000339
ghi_circ_000341
ghi_circ_000343
ghi_circ_000345
ghi_circ_000347
ghi_circ_000349
ghi_circ_000355
ghi_circ_000356
ghi_circ_000360
ghi_circ_000362
ghi_circ_000368
ghi_circ_000369
ghi_circ_000374
ghi_circ_000375
ghi_circ_000376
ghi_circ_000377
ghi_circ_000380
ghi_circ_000386
ghi_circ_000387
ghi_circ_000389
ghi_circ_000390
ghi_circ_000391
ghi_circ_000396
ghi_circ_000397
ghi_circ_000400
ghi_circ_000402
ghi_circ_000403
ghi_circ_000406
ghi_circ_000409
ghi_circ_000410
ghi_circ_000415
ghi_circ_000416
ghi_circ_000417
ghi_circ_000421
ghi_circ_000423
ghi_circ_000424
ghi_circ_000426
ghi_circ_000429
ghi_circ_000430
ghi_circ_000431
ghi_circ_000432
ghi_circ_000433
ghi_circ_000434
ghi_circ_000435
ghi_circ_000436
ghi_circ_000437
ghi_circ_000438
ghi_circ_000439
ghi_circ_000440
ghi_circ_000441
ghi_circ_000442
ghi_circ_000448
ghi_circ_000452
ghi_circ_000455
ghi_circ_000456
ghi_circ_000457
ghi_circ_000461
ghi_circ_000471
ghi_circ_000473
ghi_circ_000474
ghi_circ_000479
ghi_circ_000482
ghi_circ_000487
ghi_circ_000488
ghi_circ_000489
ghi_circ_000491
ghi_circ_000494
ghi_circ_000496
ghi_circ_000497
ghi_circ_000499
ghi_circ_000502
ghi_circ_000508
ghi_circ_000509
ghi_circ_000512
ghi_circ_000515
ghi_circ_000517
ghi_circ_000518
ghi_circ_000519
ghi_circ_000522
ghi_circ_000523
ghi_circ_000525
ghi_circ_000529
ghi_circ_000532
ghi_circ_000533
ghi_circ_000534
ghi_circ_000536
ghi_circ_000537
ghi_circ_000538
ghi_circ_000539
ghi_circ_000540
ghi_circ_000541
ghi_circ_000542
ghi_circ_000543
ghi_circ_000544
ghi_circ_000545
ghi_circ_000548
ghi_circ_000551
ghi_circ_000552
ghi_circ_000553
ghi_circ_000555
ghi_circ_000557
ghi_circ_000558
ghi_circ_000560
ghi_circ_000561
ghi_circ_000563
ghi_circ_000565
ghi_circ_000566
ghi_circ_000567
ghi_circ_000568
ghi_circ_000569
ghi_circ_000570
ghi_circ_000572
ghi_circ_000576
ghi_circ_000578
ghi_circ_000579
ghi_circ_000580
ghi_circ_000581
ghi_circ_000582
ghi_circ_000584
ghi_circ_000588
ghi_circ_000593
ghi_circ_000601
ghi_circ_000604
ghi_circ_000605
ghi_circ_000606
ghi_circ_000608
ghi_circ_000609
ghi_circ_000610
ghi_circ_000611
ghi_circ_000612
ghi_circ_000613
ghi_circ_000614
ghi_circ_000616
ghi_circ_000617
ghi_circ_000618
ghi_circ_000619
ghi_circ_000621
ghi_circ_000622
ghi_circ_000623
ghi_circ_000624
ghi_circ_000625
ghi_circ_000626
ghi_circ_000627
ghi_circ_000629
ghi_circ_000630
ghi_circ_000637
ghi_circ_000638
ghi_circ_000642
ghi_circ_000643
ghi_circ_000644
ghi_circ_000648
ghi_circ_000652
ghi_circ_000654
ghi_circ_000655
ghi_circ_000663
ghi_circ_000664
ghi_circ_000665
ghi_circ_000669
ghi_circ_000671
ghi_circ_000672
ghi_circ_000673
ghi_circ_000674
ghi_circ_000675
ghi_circ_000676
