# Supplementary material for: Identification of circularRNAs and their targets in Gossypium under Verticillium wilt stress based on RNA-seq
Source: PeerJ. 2018 Mar 16;6:e4500. doi: 10.7717/peerj.4500 (PMC5858604; doi:10.7717/peerj.4500)
Supplement: Table S21 [file peerj-06-4500-s021.xls]

## Sheet: Sheet1
CircRNA id	The differentially expressed circRNAs in each comparison
	C-RRM-vs-C-RRI	C-RSI-vs-C-RRI	C-RSM-vs-C-RRM	C-RSM-vs-C-RSI	C-SRM-vs-C-SRI	C-SSI-vs-C-SRI	C-SSM-vs-C-SRM	C-SSM-vs-C-SSI	C-SRI-vs-C-RRI	C-SRM-vs-C-RRM	C-SSI-vs-C-RSI	C-SSM-vs-C-RSM
ghi_circ_000001			ghi_circ_000001
ghi_circ_000002
ghi_circ_000003
ghi_circ_000004
ghi_circ_000005
ghi_circ_000006									ghi_circ_000006
ghi_circ_000007				ghi_circ_000007			ghi_circ_000007					ghi_circ_000007
ghi_circ_000008	ghi_circ_000008		ghi_circ_000008				ghi_circ_000008
ghi_circ_000009	ghi_circ_000009	ghi_circ_000009	ghi_circ_000009	ghi_circ_000009		ghi_circ_000009	ghi_circ_000009	ghi_circ_000009		ghi_circ_000009	ghi_circ_000009	ghi_circ_000009
ghi_circ_000010
ghi_circ_000011
ghi_circ_000012									ghi_circ_000012	ghi_circ_000012	ghi_circ_000012	ghi_circ_000012
ghi_circ_000013											ghi_circ_000013
ghi_circ_000014
ghi_circ_000015							ghi_circ_000015	ghi_circ_000015
ghi_circ_000016
ghi_circ_000017
ghi_circ_000018			ghi_circ_000018							ghi_circ_000018
ghi_circ_000019			ghi_circ_000019	ghi_circ_000019								ghi_circ_000019
ghi_circ_000020			ghi_circ_000020	ghi_circ_000020								ghi_circ_000020
ghi_circ_000021	ghi_circ_000021	ghi_circ_000021	ghi_circ_000021							ghi_circ_000021	ghi_circ_000021
ghi_circ_000022		ghi_circ_000022									ghi_circ_000022
ghi_circ_000023	ghi_circ_000023	ghi_circ_000023	ghi_circ_000023	ghi_circ_000023					ghi_circ_000023	ghi_circ_000023	ghi_circ_000023
ghi_circ_000024
ghi_circ_000025
ghi_circ_000026											ghi_circ_000026
ghi_circ_000027											ghi_circ_000027
ghi_circ_000028										ghi_circ_000028
ghi_circ_000029
ghi_circ_000030	ghi_circ_000030	ghi_circ_000030								ghi_circ_000030	ghi_circ_000030	ghi_circ_000030
ghi_circ_000031		ghi_circ_000031	ghi_circ_000031	ghi_circ_000031
ghi_circ_000032			ghi_circ_000032
ghi_circ_000033								ghi_circ_000033				ghi_circ_000033
ghi_circ_000034	ghi_circ_000034	ghi_circ_000034	ghi_circ_000034	ghi_circ_000034					ghi_circ_000034	ghi_circ_000034	ghi_circ_000034	ghi_circ_000034
ghi_circ_000035
ghi_circ_000036												ghi_circ_000036
ghi_circ_000037										ghi_circ_000037		ghi_circ_000037
ghi_circ_000038
ghi_circ_000039
ghi_circ_000040
ghi_circ_000041
ghi_circ_000042			ghi_circ_000042	ghi_circ_000042								ghi_circ_000042
ghi_circ_000043					ghi_circ_000043			ghi_circ_000043		ghi_circ_000043		ghi_circ_000043
ghi_circ_000044	ghi_circ_000044
ghi_circ_000045
ghi_circ_000046				ghi_circ_000046					ghi_circ_000046
ghi_circ_000047			ghi_circ_000047	ghi_circ_000047					ghi_circ_000047
ghi_circ_000048			ghi_circ_000048							ghi_circ_000048
ghi_circ_000049			ghi_circ_000049	ghi_circ_000049				ghi_circ_000049	ghi_circ_000049	ghi_circ_000049
ghi_circ_000050
ghi_circ_000051			ghi_circ_000051	ghi_circ_000051					ghi_circ_000051	ghi_circ_000051	ghi_circ_000051	ghi_circ_000051
ghi_circ_000052	ghi_circ_000052								ghi_circ_000052			ghi_circ_000052
ghi_circ_000053
ghi_circ_000054									ghi_circ_000054	ghi_circ_000054	ghi_circ_000054	ghi_circ_000054
ghi_circ_000055
ghi_circ_000056									ghi_circ_000056	ghi_circ_000056	ghi_circ_000056	ghi_circ_000056
ghi_circ_000057		ghi_circ_000057				ghi_circ_000057					ghi_circ_000057
ghi_circ_000058
ghi_circ_000059
ghi_circ_000060				ghi_circ_000060
ghi_circ_000061					ghi_circ_000061			ghi_circ_000061	ghi_circ_000061	ghi_circ_000061	ghi_circ_000061	ghi_circ_000061
ghi_circ_000062					ghi_circ_000062
ghi_circ_000063									ghi_circ_000063		ghi_circ_000063
ghi_circ_000064									ghi_circ_000064
ghi_circ_000065									ghi_circ_000065	ghi_circ_000065	ghi_circ_000065	ghi_circ_000065
ghi_circ_000066												ghi_circ_000066
ghi_circ_000067											ghi_circ_000067
ghi_circ_000068		ghi_circ_000068							ghi_circ_000068
ghi_circ_000069
ghi_circ_000070
ghi_circ_000071												ghi_circ_000071
ghi_circ_000072	ghi_circ_000072	ghi_circ_000072	ghi_circ_000072	ghi_circ_000072						ghi_circ_000072	ghi_circ_000072	ghi_circ_000072
ghi_circ_000073
ghi_circ_000074
ghi_circ_000075											ghi_circ_000075	ghi_circ_000075
ghi_circ_000076	ghi_circ_000076	ghi_circ_000076							ghi_circ_000076	ghi_circ_000076	ghi_circ_000076	ghi_circ_000076
ghi_circ_000077	ghi_circ_000077	ghi_circ_000077							ghi_circ_000077	ghi_circ_000077	ghi_circ_000077	ghi_circ_000077
ghi_circ_000078
ghi_circ_000079								ghi_circ_000079		ghi_circ_000079		ghi_circ_000079
ghi_circ_000080
ghi_circ_000081			ghi_circ_000081									ghi_circ_000081
ghi_circ_000082				ghi_circ_000082					ghi_circ_000082			ghi_circ_000082
ghi_circ_000083		ghi_circ_000083									ghi_circ_000083
ghi_circ_000084
ghi_circ_000085	ghi_circ_000085	ghi_circ_000085	ghi_circ_000085							ghi_circ_000085
ghi_circ_000086
ghi_circ_000087										ghi_circ_000087
ghi_circ_000088							ghi_circ_000088		ghi_circ_000088	ghi_circ_000088	ghi_circ_000088
ghi_circ_000089							ghi_circ_000089			ghi_circ_000089
ghi_circ_000090
ghi_circ_000091									ghi_circ_000091			ghi_circ_000091
ghi_circ_000092					ghi_circ_000092		ghi_circ_000092		ghi_circ_000092			ghi_circ_000092
ghi_circ_000093
ghi_circ_000094
ghi_circ_000095
ghi_circ_000096							ghi_circ_000096		ghi_circ_000096	ghi_circ_000096	ghi_circ_000096	ghi_circ_000096
ghi_circ_000097		ghi_circ_000097	ghi_circ_000097				ghi_circ_000097				ghi_circ_000097
ghi_circ_000098			ghi_circ_000098									ghi_circ_000098
ghi_circ_000099			ghi_circ_000099									ghi_circ_000099
ghi_circ_000100
ghi_circ_000101
ghi_circ_000102									ghi_circ_000102	ghi_circ_000102	ghi_circ_000102	ghi_circ_000102
ghi_circ_000103
ghi_circ_000104
ghi_circ_000105	ghi_circ_000105			ghi_circ_000105					ghi_circ_000105
ghi_circ_000106				ghi_circ_000106
ghi_circ_000107	ghi_circ_000107								ghi_circ_000107	ghi_circ_000107	ghi_circ_000107	ghi_circ_000107
ghi_circ_000108	ghi_circ_000108								ghi_circ_000108	ghi_circ_000108	ghi_circ_000108	ghi_circ_000108
ghi_circ_000109	ghi_circ_000109		ghi_circ_000109	ghi_circ_000109					ghi_circ_000109	ghi_circ_000109	ghi_circ_000109	ghi_circ_000109
ghi_circ_000110	ghi_circ_000110								ghi_circ_000110			ghi_circ_000110
ghi_circ_000111	ghi_circ_000111								ghi_circ_000111
ghi_circ_000112		ghi_circ_000112							ghi_circ_000112
ghi_circ_000113
ghi_circ_000114
ghi_circ_000115	ghi_circ_000115	ghi_circ_000115	ghi_circ_000115	ghi_circ_000115					ghi_circ_000115			ghi_circ_000115
ghi_circ_000116				ghi_circ_000116
ghi_circ_000117				ghi_circ_000117							ghi_circ_000117
ghi_circ_000118
ghi_circ_000119
ghi_circ_000120
ghi_circ_000121
ghi_circ_000122
ghi_circ_000123
ghi_circ_000124	ghi_circ_000124	ghi_circ_000124							ghi_circ_000124			ghi_circ_000124
ghi_circ_000125
ghi_circ_000126								ghi_circ_000126			ghi_circ_000126
ghi_circ_000127
ghi_circ_000128
ghi_circ_000129					ghi_circ_000129
ghi_circ_000130
ghi_circ_000131									ghi_circ_000131
ghi_circ_000132
ghi_circ_000133
ghi_circ_000134
ghi_circ_000135
ghi_circ_000136		ghi_circ_000136		ghi_circ_000136
ghi_circ_000137	ghi_circ_000137								ghi_circ_000137
ghi_circ_000138									ghi_circ_000138
ghi_circ_000139
ghi_circ_000140	ghi_circ_000140	ghi_circ_000140	ghi_circ_000140	ghi_circ_000140			ghi_circ_000140		ghi_circ_000140	ghi_circ_000140		ghi_circ_000140
ghi_circ_000141											ghi_circ_000141
ghi_circ_000142
ghi_circ_000143
ghi_circ_000144
ghi_circ_000145							ghi_circ_000145	ghi_circ_000145	ghi_circ_000145	ghi_circ_000145	ghi_circ_000145	ghi_circ_000145
ghi_circ_000146
ghi_circ_000147
ghi_circ_000148			ghi_circ_000148									ghi_circ_000148
ghi_circ_000149
ghi_circ_000150
ghi_circ_000151							ghi_circ_000151
ghi_circ_000152			ghi_circ_000152	ghi_circ_000152								ghi_circ_000152
ghi_circ_000153
ghi_circ_000154
ghi_circ_000155
ghi_circ_000156
ghi_circ_000157
ghi_circ_000158												ghi_circ_000158
ghi_circ_000159
ghi_circ_000160
ghi_circ_000161									ghi_circ_000161
ghi_circ_000162
ghi_circ_000163
ghi_circ_000164									ghi_circ_000164
ghi_circ_000165											ghi_circ_000165
ghi_circ_000166			ghi_circ_000166	ghi_circ_000166					ghi_circ_000166	ghi_circ_000166	ghi_circ_000166	ghi_circ_000166
ghi_circ_000167	ghi_circ_000167
ghi_circ_000168
ghi_circ_000169
ghi_circ_000170			ghi_circ_000170	ghi_circ_000170					ghi_circ_000170		ghi_circ_000170
ghi_circ_000171									ghi_circ_000171
ghi_circ_000172
ghi_circ_000173
ghi_circ_000174
ghi_circ_000175
ghi_circ_000176									ghi_circ_000176
ghi_circ_000177
ghi_circ_000178
ghi_circ_000179
ghi_circ_000180									ghi_circ_000180			ghi_circ_000180
ghi_circ_000181
ghi_circ_000182
ghi_circ_000183			ghi_circ_000183	ghi_circ_000183					ghi_circ_000183	ghi_circ_000183	ghi_circ_000183
ghi_circ_000184
ghi_circ_000185		ghi_circ_000185	ghi_circ_000185		ghi_circ_000185			ghi_circ_000185	ghi_circ_000185			ghi_circ_000185
ghi_circ_000186	ghi_circ_000186				ghi_circ_000186				ghi_circ_000186	ghi_circ_000186	ghi_circ_000186
ghi_circ_000187
ghi_circ_000188				ghi_circ_000188		ghi_circ_000188		ghi_circ_000188			ghi_circ_000188
ghi_circ_000189												ghi_circ_000189
ghi_circ_000190
ghi_circ_000191
ghi_circ_000192
ghi_circ_000193				ghi_circ_000193								ghi_circ_000193
ghi_circ_000194								ghi_circ_000194
ghi_circ_000195			ghi_circ_000195	ghi_circ_000195						ghi_circ_000195	ghi_circ_000195
ghi_circ_000196		ghi_circ_000196		ghi_circ_000196				ghi_circ_000196
ghi_circ_000197		ghi_circ_000197
ghi_circ_000198
ghi_circ_000199
ghi_circ_000200			ghi_circ_000200	ghi_circ_000200
ghi_circ_000201											ghi_circ_000201	ghi_circ_000201
ghi_circ_000202
ghi_circ_000203			ghi_circ_000203							ghi_circ_000203	ghi_circ_000203	ghi_circ_000203
ghi_circ_000204				ghi_circ_000204						ghi_circ_000204		ghi_circ_000204
ghi_circ_000205
ghi_circ_000206
ghi_circ_000207
ghi_circ_000208
ghi_circ_000209
ghi_circ_000210			ghi_circ_000210	ghi_circ_000210						ghi_circ_000210		ghi_circ_000210
ghi_circ_000211		ghi_circ_000211	ghi_circ_000211	ghi_circ_000211					ghi_circ_000211			ghi_circ_000211
ghi_circ_000212						ghi_circ_000212		ghi_circ_000212	ghi_circ_000212		ghi_circ_000212
ghi_circ_000213
ghi_circ_000214
ghi_circ_000215
ghi_circ_000216												ghi_circ_000216
ghi_circ_000217			ghi_circ_000217	ghi_circ_000217								ghi_circ_000217
ghi_circ_000218			ghi_circ_000218	ghi_circ_000218								ghi_circ_000218
ghi_circ_000219	ghi_circ_000219	ghi_circ_000219							ghi_circ_000219
ghi_circ_000220									ghi_circ_000220
ghi_circ_000221			ghi_circ_000221	ghi_circ_000221					ghi_circ_000221	ghi_circ_000221	ghi_circ_000221	ghi_circ_000221
ghi_circ_000222
ghi_circ_000223
ghi_circ_000224			ghi_circ_000224
ghi_circ_000225
ghi_circ_000226							ghi_circ_000226					ghi_circ_000226
ghi_circ_000227
ghi_circ_000228					ghi_circ_000228	ghi_circ_000228			ghi_circ_000228
ghi_circ_000229
ghi_circ_000230									ghi_circ_000230	ghi_circ_000230		ghi_circ_000230
ghi_circ_000231
ghi_circ_000232										ghi_circ_000232	ghi_circ_000232
ghi_circ_000233
ghi_circ_000234	ghi_circ_000234	ghi_circ_000234							ghi_circ_000234
ghi_circ_000235				ghi_circ_000235
ghi_circ_000236	ghi_circ_000236	ghi_circ_000236		ghi_circ_000236					ghi_circ_000236	ghi_circ_000236	ghi_circ_000236	ghi_circ_000236
ghi_circ_000237		ghi_circ_000237							ghi_circ_000237	ghi_circ_000237
ghi_circ_000238		ghi_circ_000238	ghi_circ_000238						ghi_circ_000238	ghi_circ_000238
ghi_circ_000239		ghi_circ_000239							ghi_circ_000239	ghi_circ_000239	ghi_circ_000239	ghi_circ_000239
ghi_circ_000240		ghi_circ_000240	ghi_circ_000240	ghi_circ_000240					ghi_circ_000240	ghi_circ_000240	ghi_circ_000240	ghi_circ_000240
ghi_circ_000241									ghi_circ_000241	ghi_circ_000241	ghi_circ_000241	ghi_circ_000241
ghi_circ_000242												ghi_circ_000242
ghi_circ_000243										ghi_circ_000243	ghi_circ_000243	ghi_circ_000243
ghi_circ_000244										ghi_circ_000244
ghi_circ_000245											ghi_circ_000245
ghi_circ_000246												ghi_circ_000246
ghi_circ_000247				ghi_circ_000247								ghi_circ_000247
ghi_circ_000248	ghi_circ_000248	ghi_circ_000248							ghi_circ_000248
ghi_circ_000249												ghi_circ_000249
ghi_circ_000250			ghi_circ_000250	ghi_circ_000250				ghi_circ_000250			ghi_circ_000250	ghi_circ_000250
ghi_circ_000251
ghi_circ_000252	ghi_circ_000252
ghi_circ_000253
ghi_circ_000254										ghi_circ_000254
ghi_circ_000255
ghi_circ_000256
ghi_circ_000257										ghi_circ_000257
ghi_circ_000258			ghi_circ_000258									ghi_circ_000258
ghi_circ_000259
ghi_circ_000260
ghi_circ_000261			ghi_circ_000261									ghi_circ_000261
ghi_circ_000262
ghi_circ_000263				ghi_circ_000263
ghi_circ_000264									ghi_circ_000264
ghi_circ_000265									ghi_circ_000265	ghi_circ_000265	ghi_circ_000265	ghi_circ_000265
ghi_circ_000266			ghi_circ_000266	ghi_circ_000266	ghi_circ_000266		ghi_circ_000266			ghi_circ_000266	ghi_circ_000266	ghi_circ_000266
ghi_circ_000267		ghi_circ_000267				ghi_circ_000267				ghi_circ_000267		ghi_circ_000267
ghi_circ_000268	ghi_circ_000268	ghi_circ_000268							ghi_circ_000268
ghi_circ_000269									ghi_circ_000269			ghi_circ_000269
ghi_circ_000270									ghi_circ_000270	ghi_circ_000270		ghi_circ_000270
ghi_circ_000271
ghi_circ_000272										ghi_circ_000272
ghi_circ_000273
ghi_circ_000274	ghi_circ_000274	ghi_circ_000274							ghi_circ_000274
ghi_circ_000275
ghi_circ_000276
ghi_circ_000277
ghi_circ_000278	ghi_circ_000278				ghi_circ_000278		ghi_circ_000278
ghi_circ_000279	ghi_circ_000279		ghi_circ_000279							ghi_circ_000279
ghi_circ_000280
ghi_circ_000281
ghi_circ_000282
ghi_circ_000283
ghi_circ_000284
ghi_circ_000285								ghi_circ_000285		ghi_circ_000285
ghi_circ_000286
ghi_circ_000287
ghi_circ_000288
ghi_circ_000289
ghi_circ_000290
ghi_circ_000291
ghi_circ_000292	ghi_circ_000292	ghi_circ_000292	ghi_circ_000292	ghi_circ_000292	ghi_circ_000292		ghi_circ_000292		ghi_circ_000292			ghi_circ_000292
ghi_circ_000293									ghi_circ_000293
ghi_circ_000294									ghi_circ_000294
ghi_circ_000295							ghi_circ_000295
ghi_circ_000296
ghi_circ_000297
ghi_circ_000298
ghi_circ_000299
ghi_circ_000300		ghi_circ_000300	ghi_circ_000300			ghi_circ_000300	ghi_circ_000300					ghi_circ_000300
ghi_circ_000301			ghi_circ_000301
ghi_circ_000302
ghi_circ_000303
ghi_circ_000304
ghi_circ_000305									ghi_circ_000305
ghi_circ_000306			ghi_circ_000306						ghi_circ_000306	ghi_circ_000306	ghi_circ_000306	ghi_circ_000306
ghi_circ_000307			ghi_circ_000307	ghi_circ_000307							ghi_circ_000307	ghi_circ_000307
ghi_circ_000308		ghi_circ_000308	ghi_circ_000308	ghi_circ_000308						ghi_circ_000308	ghi_circ_000308	ghi_circ_000308
ghi_circ_000309	ghi_circ_000309	ghi_circ_000309	ghi_circ_000309	ghi_circ_000309	ghi_circ_000309					ghi_circ_000309	ghi_circ_000309
ghi_circ_000310		ghi_circ_000310	ghi_circ_000310	ghi_circ_000310								ghi_circ_000310
ghi_circ_000311			ghi_circ_000311	ghi_circ_000311								ghi_circ_000311
ghi_circ_000312											ghi_circ_000312
ghi_circ_000313
ghi_circ_000314			ghi_circ_000314	ghi_circ_000314			ghi_circ_000314			ghi_circ_000314		ghi_circ_000314
ghi_circ_000315								ghi_circ_000315
ghi_circ_000316
ghi_circ_000317
ghi_circ_000318										ghi_circ_000318
ghi_circ_000319
ghi_circ_000320
ghi_circ_000321												ghi_circ_000321
ghi_circ_000322		ghi_circ_000322	ghi_circ_000322	ghi_circ_000322		ghi_circ_000322	ghi_circ_000322		ghi_circ_000322	ghi_circ_000322	ghi_circ_000322
ghi_circ_000323
ghi_circ_000324
ghi_circ_000325									ghi_circ_000325
ghi_circ_000326			ghi_circ_000326	ghi_circ_000326								ghi_circ_000326
ghi_circ_000327						ghi_circ_000327
ghi_circ_000328	ghi_circ_000328	ghi_circ_000328	ghi_circ_000328	ghi_circ_000328					ghi_circ_000328	ghi_circ_000328	ghi_circ_000328	ghi_circ_000328
ghi_circ_000329
ghi_circ_000330						ghi_circ_000330		ghi_circ_000330			ghi_circ_000330
ghi_circ_000331												ghi_circ_000331
ghi_circ_000332
ghi_circ_000333
ghi_circ_000334			ghi_circ_000334
ghi_circ_000335		ghi_circ_000335		ghi_circ_000335				ghi_circ_000335			ghi_circ_000335	ghi_circ_000335
ghi_circ_000336	ghi_circ_000336	ghi_circ_000336	ghi_circ_000336	ghi_circ_000336			ghi_circ_000336				ghi_circ_000336
ghi_circ_000337	ghi_circ_000337		ghi_circ_000337	ghi_circ_000337	ghi_circ_000337		ghi_circ_000337		ghi_circ_000337		ghi_circ_000337
ghi_circ_000338	ghi_circ_000338		ghi_circ_000338	ghi_circ_000338	ghi_circ_000338	ghi_circ_000338	ghi_circ_000338		ghi_circ_000338		ghi_circ_000338
ghi_circ_000339		ghi_circ_000339	ghi_circ_000339	ghi_circ_000339		ghi_circ_000339		ghi_circ_000339	ghi_circ_000339	ghi_circ_000339	ghi_circ_000339	ghi_circ_000339
ghi_circ_000340
ghi_circ_000341
ghi_circ_000342	ghi_circ_000342
ghi_circ_000343
ghi_circ_000344
ghi_circ_000345
ghi_circ_000346												ghi_circ_000346
ghi_circ_000347
ghi_circ_000348
ghi_circ_000349			ghi_circ_000349	ghi_circ_000349					ghi_circ_000349	ghi_circ_000349	ghi_circ_000349	ghi_circ_000349
ghi_circ_000350
ghi_circ_000351
ghi_circ_000352											ghi_circ_000352
ghi_circ_000353	ghi_circ_000353									ghi_circ_000353
ghi_circ_000354											ghi_circ_000354
ghi_circ_000355	ghi_circ_000355		ghi_circ_000355						ghi_circ_000355	ghi_circ_000355	ghi_circ_000355
ghi_circ_000356			ghi_circ_000356	ghi_circ_000356					ghi_circ_000356	ghi_circ_000356	ghi_circ_000356
ghi_circ_000357
ghi_circ_000358			ghi_circ_000358	ghi_circ_000358					ghi_circ_000358	ghi_circ_000358	ghi_circ_000358	ghi_circ_000358
ghi_circ_000359
ghi_circ_000360												ghi_circ_000360
ghi_circ_000361	ghi_circ_000361	ghi_circ_000361							ghi_circ_000361
ghi_circ_000362									ghi_circ_000362	ghi_circ_000362	ghi_circ_000362	ghi_circ_000362
ghi_circ_000363		ghi_circ_000363		ghi_circ_000363
ghi_circ_000364									ghi_circ_000364	ghi_circ_000364	ghi_circ_000364	ghi_circ_000364
ghi_circ_000365											ghi_circ_000365
ghi_circ_000366										ghi_circ_000366	ghi_circ_000366
ghi_circ_000367			ghi_circ_000367	ghi_circ_000367					ghi_circ_000367	ghi_circ_000367		ghi_circ_000367
ghi_circ_000368
ghi_circ_000369	ghi_circ_000369		ghi_circ_000369			ghi_circ_000369		ghi_circ_000369	ghi_circ_000369	ghi_circ_000369		ghi_circ_000369
ghi_circ_000370
ghi_circ_000371
ghi_circ_000372	ghi_circ_000372	ghi_circ_000372							ghi_circ_000372
ghi_circ_000373	ghi_circ_000373	ghi_circ_000373							ghi_circ_000373
ghi_circ_000374
ghi_circ_000375						ghi_circ_000375
ghi_circ_000376
ghi_circ_000377
ghi_circ_000378	ghi_circ_000378									ghi_circ_000378
ghi_circ_000379										ghi_circ_000379	ghi_circ_000379
ghi_circ_000380						ghi_circ_000380		ghi_circ_000380
ghi_circ_000381			ghi_circ_000381	ghi_circ_000381								ghi_circ_000381
ghi_circ_000382						ghi_circ_000382					ghi_circ_000382
ghi_circ_000383							ghi_circ_000383
ghi_circ_000384
ghi_circ_000385										ghi_circ_000385
ghi_circ_000386
ghi_circ_000387			ghi_circ_000387	ghi_circ_000387				ghi_circ_000387	ghi_circ_000387	ghi_circ_000387		ghi_circ_000387
ghi_circ_000388			ghi_circ_000388	ghi_circ_000388					ghi_circ_000388	ghi_circ_000388		ghi_circ_000388
ghi_circ_000389
ghi_circ_000390
ghi_circ_000391			ghi_circ_000391	ghi_circ_000391		ghi_circ_000391			ghi_circ_000391
ghi_circ_000392			ghi_circ_000392	ghi_circ_000392							ghi_circ_000392	ghi_circ_000392
ghi_circ_000393				ghi_circ_000393					ghi_circ_000393	ghi_circ_000393	ghi_circ_000393	ghi_circ_000393
ghi_circ_000394												ghi_circ_000394
ghi_circ_000395									ghi_circ_000395	ghi_circ_000395	ghi_circ_000395	ghi_circ_000395
ghi_circ_000396
ghi_circ_000397
ghi_circ_000398
ghi_circ_000399
ghi_circ_000400
ghi_circ_000401						ghi_circ_000401		ghi_circ_000401				ghi_circ_000401
ghi_circ_000402		ghi_circ_000402	ghi_circ_000402				ghi_circ_000402	ghi_circ_000402			ghi_circ_000402	ghi_circ_000402
ghi_circ_000403		ghi_circ_000403	ghi_circ_000403				ghi_circ_000403	ghi_circ_000403			ghi_circ_000403	ghi_circ_000403
ghi_circ_000404					ghi_circ_000404				ghi_circ_000404	ghi_circ_000404	ghi_circ_000404	ghi_circ_000404
ghi_circ_000405
ghi_circ_000406											ghi_circ_000406
ghi_circ_000407			ghi_circ_000407	ghi_circ_000407								ghi_circ_000407
ghi_circ_000408												ghi_circ_000408
ghi_circ_000409			ghi_circ_000409	ghi_circ_000409								ghi_circ_000409
ghi_circ_000410			ghi_circ_000410	ghi_circ_000410
ghi_circ_000411
ghi_circ_000412
ghi_circ_000413		ghi_circ_000413		ghi_circ_000413
ghi_circ_000414										ghi_circ_000414	ghi_circ_000414
ghi_circ_000415
ghi_circ_000416
ghi_circ_000417
ghi_circ_000418
ghi_circ_000419			ghi_circ_000419						ghi_circ_000419		ghi_circ_000419	ghi_circ_000419
ghi_circ_000420										ghi_circ_000420		ghi_circ_000420
ghi_circ_000421			ghi_circ_000421	ghi_circ_000421						ghi_circ_000421	ghi_circ_000421
ghi_circ_000422					ghi_circ_000422				ghi_circ_000422		ghi_circ_000422
ghi_circ_000423				ghi_circ_000423
ghi_circ_000424
ghi_circ_000425					ghi_circ_000425	ghi_circ_000425		ghi_circ_000425	ghi_circ_000425	ghi_circ_000425	ghi_circ_000425	ghi_circ_000425
ghi_circ_000426
ghi_circ_000427									ghi_circ_000427		ghi_circ_000427	ghi_circ_000427
ghi_circ_000428						ghi_circ_000428
ghi_circ_000429			ghi_circ_000429	ghi_circ_000429	ghi_circ_000429						ghi_circ_000429	ghi_circ_000429
ghi_circ_000430			ghi_circ_000430			ghi_circ_000430				ghi_circ_000430
ghi_circ_000431			ghi_circ_000431	ghi_circ_000431								ghi_circ_000431
ghi_circ_000432			ghi_circ_000432
ghi_circ_000433			ghi_circ_000433	ghi_circ_000433								ghi_circ_000433
ghi_circ_000434			ghi_circ_000434	ghi_circ_000434					ghi_circ_000434			ghi_circ_000434
ghi_circ_000435			ghi_circ_000435	ghi_circ_000435								ghi_circ_000435
ghi_circ_000436
ghi_circ_000437			ghi_circ_000437
ghi_circ_000438				ghi_circ_000438					ghi_circ_000438	ghi_circ_000438	ghi_circ_000438
ghi_circ_000439
ghi_circ_000440
ghi_circ_000441
ghi_circ_000442					ghi_circ_000442		ghi_circ_000442		ghi_circ_000442			ghi_circ_000442
ghi_circ_000443
ghi_circ_000444									ghi_circ_000444	ghi_circ_000444	ghi_circ_000444
ghi_circ_000445										ghi_circ_000445		ghi_circ_000445
ghi_circ_000446												ghi_circ_000446
ghi_circ_000447											ghi_circ_000447
ghi_circ_000448		ghi_circ_000448	ghi_circ_000448	ghi_circ_000448					ghi_circ_000448	ghi_circ_000448	ghi_circ_000448	ghi_circ_000448
ghi_circ_000449		ghi_circ_000449	ghi_circ_000449	ghi_circ_000449					ghi_circ_000449			ghi_circ_000449
ghi_circ_000450
ghi_circ_000451	ghi_circ_000451		ghi_circ_000451	ghi_circ_000451					ghi_circ_000451	ghi_circ_000451	ghi_circ_000451	ghi_circ_000451
ghi_circ_000452
ghi_circ_000453			ghi_circ_000453	ghi_circ_000453					ghi_circ_000453	ghi_circ_000453	ghi_circ_000453	ghi_circ_000453
ghi_circ_000454												ghi_circ_000454
ghi_circ_000455
ghi_circ_000456			ghi_circ_000456									ghi_circ_000456
ghi_circ_000457
ghi_circ_000458	ghi_circ_000458	ghi_circ_000458							ghi_circ_000458	ghi_circ_000458
ghi_circ_000459		ghi_circ_000459							ghi_circ_000459
ghi_circ_000460				ghi_circ_000460
ghi_circ_000461
ghi_circ_000462			ghi_circ_000462	ghi_circ_000462					ghi_circ_000462	ghi_circ_000462	ghi_circ_000462	ghi_circ_000462
ghi_circ_000463			ghi_circ_000463	ghi_circ_000463					ghi_circ_000463			ghi_circ_000463
ghi_circ_000464			ghi_circ_000464	ghi_circ_000464								ghi_circ_000464
ghi_circ_000465		ghi_circ_000465	ghi_circ_000465	ghi_circ_000465							ghi_circ_000465	ghi_circ_000465
ghi_circ_000466			ghi_circ_000466	ghi_circ_000466								ghi_circ_000466
ghi_circ_000467	ghi_circ_000467		ghi_circ_000467	ghi_circ_000467					ghi_circ_000467			ghi_circ_000467
ghi_circ_000468	ghi_circ_000468	ghi_circ_000468	ghi_circ_000468	ghi_circ_000468					ghi_circ_000468			ghi_circ_000468
ghi_circ_000469			ghi_circ_000469	ghi_circ_000469					ghi_circ_000469	ghi_circ_000469	ghi_circ_000469	ghi_circ_000469
ghi_circ_000470					ghi_circ_000470		ghi_circ_000470
ghi_circ_000471			ghi_circ_000471
ghi_circ_000472
ghi_circ_000473
ghi_circ_000474		ghi_circ_000474		ghi_circ_000474
ghi_circ_000475						ghi_circ_000475
ghi_circ_000476		ghi_circ_000476	ghi_circ_000476	ghi_circ_000476			ghi_circ_000476		ghi_circ_000476	ghi_circ_000476	ghi_circ_000476
ghi_circ_000477		ghi_circ_000477		ghi_circ_000477		ghi_circ_000477	ghi_circ_000477					ghi_circ_000477
ghi_circ_000478		ghi_circ_000478		ghi_circ_000478		ghi_circ_000478		ghi_circ_000478
ghi_circ_000479		ghi_circ_000479	ghi_circ_000479						ghi_circ_000479	ghi_circ_000479	ghi_circ_000479	ghi_circ_000479
ghi_circ_000480		ghi_circ_000480		ghi_circ_000480		ghi_circ_000480
ghi_circ_000481									ghi_circ_000481	ghi_circ_000481	ghi_circ_000481	ghi_circ_000481
ghi_circ_000482			ghi_circ_000482	ghi_circ_000482			ghi_circ_000482		ghi_circ_000482	ghi_circ_000482	ghi_circ_000482	ghi_circ_000482
ghi_circ_000483
ghi_circ_000484			ghi_circ_000484	ghi_circ_000484					ghi_circ_000484			ghi_circ_000484
ghi_circ_000485									ghi_circ_000485	ghi_circ_000485		ghi_circ_000485
ghi_circ_000486			ghi_circ_000486	ghi_circ_000486					ghi_circ_000486	ghi_circ_000486	ghi_circ_000486	ghi_circ_000486
ghi_circ_000487
ghi_circ_000488
ghi_circ_000489
ghi_circ_000490								ghi_circ_000490			ghi_circ_000490
ghi_circ_000491	ghi_circ_000491								ghi_circ_000491
ghi_circ_000492						ghi_circ_000492	ghi_circ_000492				ghi_circ_000492	ghi_circ_000492
ghi_circ_000493												ghi_circ_000493
ghi_circ_000494									ghi_circ_000494
ghi_circ_000495
ghi_circ_000496		ghi_circ_000496	ghi_circ_000496						ghi_circ_000496
ghi_circ_000497
ghi_circ_000498
ghi_circ_000499							ghi_circ_000499	ghi_circ_000499
ghi_circ_000500
ghi_circ_000501	ghi_circ_000501	ghi_circ_000501	ghi_circ_000501	ghi_circ_000501						ghi_circ_000501
ghi_circ_000502
ghi_circ_000503
ghi_circ_000504											ghi_circ_000504
ghi_circ_000505
ghi_circ_000506
ghi_circ_000507
ghi_circ_000508
ghi_circ_000509
ghi_circ_000510
ghi_circ_000511
ghi_circ_000512			ghi_circ_000512	ghi_circ_000512								ghi_circ_000512
ghi_circ_000513
ghi_circ_000514						ghi_circ_000514					ghi_circ_000514	ghi_circ_000514
ghi_circ_000515
ghi_circ_000516
ghi_circ_000517
ghi_circ_000518		ghi_circ_000518
ghi_circ_000519	ghi_circ_000519		ghi_circ_000519	ghi_circ_000519				ghi_circ_000519	ghi_circ_000519	ghi_circ_000519	ghi_circ_000519	ghi_circ_000519
ghi_circ_000520	ghi_circ_000520	ghi_circ_000520								ghi_circ_000520		ghi_circ_000520
ghi_circ_000521
ghi_circ_000522												ghi_circ_000522
ghi_circ_000523		ghi_circ_000523									ghi_circ_000523	ghi_circ_000523
ghi_circ_000524					ghi_circ_000524		ghi_circ_000524
ghi_circ_000525			ghi_circ_000525	ghi_circ_000525								ghi_circ_000525
ghi_circ_000526				ghi_circ_000526
ghi_circ_000527
ghi_circ_000528	ghi_circ_000528			ghi_circ_000528			ghi_circ_000528		ghi_circ_000528		ghi_circ_000528
ghi_circ_000529
ghi_circ_000530								ghi_circ_000530				ghi_circ_000530
ghi_circ_000531
ghi_circ_000532
ghi_circ_000533										ghi_circ_000533		ghi_circ_000533
ghi_circ_000534									ghi_circ_000534
ghi_circ_000535
ghi_circ_000536
ghi_circ_000537										ghi_circ_000537
ghi_circ_000538					ghi_circ_000538	ghi_circ_000538			ghi_circ_000538	ghi_circ_000538		ghi_circ_000538
ghi_circ_000539
ghi_circ_000540
ghi_circ_000541									ghi_circ_000541			ghi_circ_000541
ghi_circ_000542
ghi_circ_000543			ghi_circ_000543
ghi_circ_000544			ghi_circ_000544
ghi_circ_000545
ghi_circ_000546
ghi_circ_000547
ghi_circ_000548
ghi_circ_000549
ghi_circ_000550		ghi_circ_000550	ghi_circ_000550				ghi_circ_000550
ghi_circ_000551	ghi_circ_000551	ghi_circ_000551						ghi_circ_000551
ghi_circ_000552			ghi_circ_000552
ghi_circ_000553						ghi_circ_000553			ghi_circ_000553
ghi_circ_000554	ghi_circ_000554									ghi_circ_000554		ghi_circ_000554
ghi_circ_000555
ghi_circ_000556
ghi_circ_000557			ghi_circ_000557	ghi_circ_000557								ghi_circ_000557
ghi_circ_000558				ghi_circ_000558								ghi_circ_000558
ghi_circ_000559
ghi_circ_000560
ghi_circ_000561
ghi_circ_000562
ghi_circ_000563
ghi_circ_000564
ghi_circ_000565	ghi_circ_000565	ghi_circ_000565		ghi_circ_000565								ghi_circ_000565
ghi_circ_000566									ghi_circ_000566
ghi_circ_000567
ghi_circ_000568
ghi_circ_000569									ghi_circ_000569
ghi_circ_000570
ghi_circ_000571
ghi_circ_000572										ghi_circ_000572
ghi_circ_000573
ghi_circ_000574	ghi_circ_000574	ghi_circ_000574		ghi_circ_000574					ghi_circ_000574
ghi_circ_000575		ghi_circ_000575	ghi_circ_000575	ghi_circ_000575					ghi_circ_000575		ghi_circ_000575
ghi_circ_000576			ghi_circ_000576	ghi_circ_000576	ghi_circ_000576		ghi_circ_000576		ghi_circ_000576	ghi_circ_000576	ghi_circ_000576
ghi_circ_000577
ghi_circ_000578	ghi_circ_000578	ghi_circ_000578								ghi_circ_000578	ghi_circ_000578	ghi_circ_000578
ghi_circ_000579
ghi_circ_000580
ghi_circ_000581
ghi_circ_000582
ghi_circ_000583												ghi_circ_000583
ghi_circ_000584			ghi_circ_000584
ghi_circ_000585									ghi_circ_000585
ghi_circ_000586			ghi_circ_000586	ghi_circ_000586								ghi_circ_000586
ghi_circ_000587			ghi_circ_000587	ghi_circ_000587								ghi_circ_000587
ghi_circ_000588
ghi_circ_000589
ghi_circ_000590
ghi_circ_000591						ghi_circ_000591	ghi_circ_000591		ghi_circ_000591	ghi_circ_000591
ghi_circ_000592
ghi_circ_000593		ghi_circ_000593
ghi_circ_000594
ghi_circ_000595
ghi_circ_000596
ghi_circ_000597		ghi_circ_000597
ghi_circ_000598		ghi_circ_000598				ghi_circ_000598					ghi_circ_000598
ghi_circ_000599									ghi_circ_000599
ghi_circ_000600
ghi_circ_000601			ghi_circ_000601									ghi_circ_000601
ghi_circ_000602										ghi_circ_000602	ghi_circ_000602
ghi_circ_000603										ghi_circ_000603
ghi_circ_000604
ghi_circ_000605
ghi_circ_000606			ghi_circ_000606								ghi_circ_000606
ghi_circ_000607									ghi_circ_000607
ghi_circ_000608									ghi_circ_000608
ghi_circ_000609
ghi_circ_000610
ghi_circ_000611			ghi_circ_000611
ghi_circ_000612
ghi_circ_000613
ghi_circ_000614
ghi_circ_000615						ghi_circ_000615			ghi_circ_000615	ghi_circ_000615		ghi_circ_000615
ghi_circ_000616
ghi_circ_000617
ghi_circ_000618
ghi_circ_000619									ghi_circ_000619
ghi_circ_000620
ghi_circ_000621
ghi_circ_000622
ghi_circ_000623					ghi_circ_000623		ghi_circ_000623
ghi_circ_000624				ghi_circ_000624	ghi_circ_000624
ghi_circ_000625
ghi_circ_000626	ghi_circ_000626		ghi_circ_000626		ghi_circ_000626				ghi_circ_000626			ghi_circ_000626
ghi_circ_000627
ghi_circ_000628									ghi_circ_000628
ghi_circ_000629			ghi_circ_000629
ghi_circ_000630										ghi_circ_000630
ghi_circ_000631
ghi_circ_000632		ghi_circ_000632		ghi_circ_000632							ghi_circ_000632
ghi_circ_000633
ghi_circ_000634
ghi_circ_000635			ghi_circ_000635	ghi_circ_000635					ghi_circ_000635	ghi_circ_000635	ghi_circ_000635	ghi_circ_000635
ghi_circ_000636		ghi_circ_000636							ghi_circ_000636	ghi_circ_000636	ghi_circ_000636	ghi_circ_000636
ghi_circ_000637
ghi_circ_000638			ghi_circ_000638									ghi_circ_000638
ghi_circ_000639					ghi_circ_000639
ghi_circ_000640
ghi_circ_000641												ghi_circ_000641
ghi_circ_000642
ghi_circ_000643										ghi_circ_000643
ghi_circ_000644						ghi_circ_000644			ghi_circ_000644
ghi_circ_000645
ghi_circ_000646
ghi_circ_000647
ghi_circ_000648
ghi_circ_000649									ghi_circ_000649	ghi_circ_000649	ghi_circ_000649	ghi_circ_000649
ghi_circ_000650										ghi_circ_000650		ghi_circ_000650
ghi_circ_000651										ghi_circ_000651
ghi_circ_000652				ghi_circ_000652	ghi_circ_000652		ghi_circ_000652					ghi_circ_000652
ghi_circ_000653
ghi_circ_000654
ghi_circ_000655				ghi_circ_000655								ghi_circ_000655
ghi_circ_000656			ghi_circ_000656
ghi_circ_000657	ghi_circ_000657	ghi_circ_000657							ghi_circ_000657	ghi_circ_000657	ghi_circ_000657	ghi_circ_000657
ghi_circ_000658	ghi_circ_000658	ghi_circ_000658		ghi_circ_000658					ghi_circ_000658	ghi_circ_000658	ghi_circ_000658	ghi_circ_000658
ghi_circ_000659										ghi_circ_000659	ghi_circ_000659
ghi_circ_000660
ghi_circ_000661
ghi_circ_000662	ghi_circ_000662	ghi_circ_000662							ghi_circ_000662
ghi_circ_000663							ghi_circ_000663					ghi_circ_000663
ghi_circ_000664									ghi_circ_000664			ghi_circ_000664
ghi_circ_000665		ghi_circ_000665
ghi_circ_000666		ghi_circ_000666
ghi_circ_000667			ghi_circ_000667	ghi_circ_000667								ghi_circ_000667
ghi_circ_000668							ghi_circ_000668			ghi_circ_000668
ghi_circ_000669
ghi_circ_000670
ghi_circ_000671
ghi_circ_000672
ghi_circ_000673
ghi_circ_000674
ghi_circ_000675			ghi_circ_000675
ghi_circ_000676
ghi_circ_000677				ghi_circ_000677								ghi_circ_000677
ghi_circ_000678		ghi_circ_000678		ghi_circ_000678					ghi_circ_000678			ghi_circ_000678
ghi_circ_000679			ghi_circ_000679
ghi_circ_000680
ghi_circ_000681							ghi_circ_000681			ghi_circ_000681
ghi_circ_000682
ghi_circ_000683											ghi_circ_000683
ghi_circ_000684
ghi_circ_000685
ghi_circ_000686				ghi_circ_000686						ghi_circ_000686	ghi_circ_000686	ghi_circ_000686
