# Supplementary material for: Identification of circularRNAs and their targets in Gossypium under Verticillium wilt stress based on RNA-seq
Source: PeerJ. 2018 Mar 16;6:e4500. doi: 10.7717/peerj.4500 (PMC5858604; doi:10.7717/peerj.4500)
Supplement: Table S22 [file peerj-06-4500-s022.xls]

## Sheet: Sheet1
GeneID	source gene	Description	B class Pathway	C class Pathway	GO Component	GO Function	GO Process
ghi_circ_000662	Gh_D12G2094	NCS1_COPJA S-norcoclaurine synthase 1 OS=Coptis japonica GN=NCS1 PE=1 SV=1	Global and overview maps;Global and overview maps;Biosynthesis of other secondary metabolites	ko01100//Metabolic pathways;ko01110//Biosynthesis of secondary metabolites;ko00941//Flavonoid biosynthesis	-	GO:0016706//oxidoreductase activity, acting on paired donors, with incorporation or reduction of molecular oxygen, 2-oxoglutarate as one donor, and incorporation of one atom each of oxygen into both donors;GO:0016491//oxidoreductase activity	GO:0055114//oxidation-reduction process
ghi_circ_000658	Gh_D12G1051	BAP2_ARATH BON1-associated protein 2 OS=Arabidopsis thaliana GN=BAP2 PE=1 SV=1	-	-	-	GO:0005515//protein binding	-
ghi_circ_000657	Gh_D12G1051	BAP2_ARATH BON1-associated protein 2 OS=Arabidopsis thaliana GN=BAP2 PE=1 SV=1	-	-	-	GO:0005515//protein binding	-
ghi_circ_000626	Gh_D11G2925	-	-	-	-	-	-
ghi_circ_000578	Gh_D10G0257	E6_GOSHI Protein E6 OS=Gossypium hirsutum GN=E6 PE=2 SV=1	-	-	-	-	-
ghi_circ_000574	Gh_D09G2022	-	-	-	-	-	-
ghi_circ_000565	Gh_D09G1575	PDC1_ARATH Pyruvate decarboxylase 1 OS=Arabidopsis thaliana GN=PDC1 PE=2 SV=1	-	-	-	GO:0000287//magnesium ion binding;GO:0003824//catalytic activity;GO:0030976//thiamine pyrophosphate binding	-
ghi_circ_000554	NA
ghi_circ_000551	Gh_D09G0168	Y4885_ARATH Probable LRR receptor-like serine/threonine-protein kinase At4g08850 OS=Arabidopsis thaliana GN=At4g08850 PE=1 SV=3	Replication and repair	ko03410//Base excision repair	-	GO:0004713//protein tyrosine kinase activity;GO:0005524//ATP binding;GO:0004672//protein kinase activity	GO:0006468//protein phosphorylation
ghi_circ_000528	Gh_D08G0270	DXS2_ORYSJ Probable 1-deoxy-D-xylulose-5-phosphate synthase 2, chloroplastic OS=Oryza sativa subsp. japonica GN=Os07g0190000 PE=2 SV=1	Global and overview maps;Global and overview maps;Metabolism of terpenoids and polyketides	ko01100//Metabolic pathways;ko01110//Biosynthesis of secondary metabolites;ko00900//Terpenoid backbone biosynthesis	-	GO:0008661//1-deoxy-D-xylulose-5-phosphate synthase activity;GO:0003824//catalytic activity	GO:0008152//metabolic process;GO:0016114//terpenoid biosynthetic process
ghi_circ_000520	Gh_D08G0020	CUCM1_CUCME Cucumisin OS=Cucumis melo PE=1 SV=1	-	-	-	GO:0004252//serine-type endopeptidase activity;GO:0042802//identical protein binding	GO:0006508//proteolysis;GO:0043086//negative regulation of catalytic activity
ghi_circ_000519	Gh_D07G2008	QORH_ARATH Putative quinone-oxidoreductase homolog, chloroplastic OS=Arabidopsis thaliana GN=At4g13010 PE=2 SV=1	Global and overview maps;Global and overview maps;Carbohydrate metabolism;Amino acid metabolism;Lipid metabolism	ko01100//Metabolic pathways;ko01110//Biosynthesis of secondary metabolites;ko00010//Glycolysis / Gluconeogenesis;ko00350//Tyrosine metabolism;ko00071//Fatty acid metabolism	-	GO:0008270//zinc ion binding;GO:0016747//transferase activity, transferring acyl groups other than amino-acyl groups;GO:0016491//oxidoreductase activity	GO:0055114//oxidation-reduction process
ghi_circ_000501	Gh_D06G0902	INV1_ARATH Beta-fructofuranosidase, insoluble isoenzyme CWINV1 OS=Arabidopsis thaliana GN=CWINV1 PE=1 SV=1	Global and overview maps;Carbohydrate metabolism;Carbohydrate metabolism	ko01100//Metabolic pathways;ko00500//Starch and sucrose metabolism;ko00052//Galactose metabolism	-	GO:0004553//hydrolase activity, hydrolyzing O-glycosyl compounds	GO:0005975//carbohydrate metabolic process
ghi_circ_000491	Gh_D05G3611	SUMO1_ARATH Small ubiquitin-related modifier 1 OS=Arabidopsis thaliana GN=SUMO1 PE=1 SV=2	Translation	ko03013//RNA transport	-	GO:0008146//sulfotransferase activity;GO:0005515//protein binding	-
ghi_circ_000468	Gh_D05G2355	LAC14_ARATH Laccase-14 OS=Arabidopsis thaliana GN=LAC14 PE=2 SV=1	-	-	-	GO:0005507//copper ion binding;GO:0016491//oxidoreductase activity	GO:0055114//oxidation-reduction process
ghi_circ_000467	Gh_D05G2355	LAC14_ARATH Laccase-14 OS=Arabidopsis thaliana GN=LAC14 PE=2 SV=1	-	-	-	GO:0005507//copper ion binding;GO:0016491//oxidoreductase activity	GO:0055114//oxidation-reduction process
ghi_circ_000458	Gh_D05G2085	OPT4_ARATH Oligopeptide transporter 4 OS=Arabidopsis thaliana GN=OPT4 PE=2 SV=1	-	-	-	-	GO:0055085//transmembrane transport
ghi_circ_000451	Gh_D05G1184	PDR1_TOBAC Pleiotropic drug resistance protein 1 OS=Nicotiana tabacum GN=PDR1 PE=2 SV=1	-	-	GO:0016020//membrane	GO:0005524//ATP binding;GO:0000166//nucleotide binding;GO:0017111//nucleoside-triphosphatase activity;GO:0016887//ATPase activity	-
ghi_circ_000378	Gh_D02G1447	MLP31_ARATH MLP-like protein 31 OS=Arabidopsis thaliana GN=MLP31 PE=2 SV=2	-	-	-	-	GO:0006952//defense response;GO:0009607//response to biotic stimulus
ghi_circ_000373	Gh_D02G0719	PUB29_ARATH U-box domain-containing protein 29 OS=Arabidopsis thaliana GN=PUB29 PE=1 SV=1	-	-	GO:0000151//ubiquitin ligase complex	GO:0004842//ubiquitin-protein ligase activity	GO:0016567//protein ubiquitination
ghi_circ_000372	Gh_D02G0719	PUB29_ARATH U-box domain-containing protein 29 OS=Arabidopsis thaliana GN=PUB29 PE=1 SV=1	-	-	GO:0000151//ubiquitin ligase complex	GO:0004842//ubiquitin-protein ligase activity	GO:0016567//protein ubiquitination
ghi_circ_000369	Gh_D02G0328	GSTU7_ARATH Glutathione S-transferase U7 OS=Arabidopsis thaliana GN=GSTU7 PE=2 SV=1	Metabolism of other amino acids	ko00480//Glutathione metabolism	-	GO:0005515//protein binding	-
ghi_circ_000361	Gh_D02G0131	RGA2_BRACM DELLA protein RGA2 OS=Brassica campestris GN=RGA2 PE=3 SV=1	-	-	-	GO:0003677//DNA binding	-
ghi_circ_000355	Gh_D02G0094	R13L1_ARATH Putative disease resistance RPP13-like protein 1 OS=Arabidopsis thaliana GN=RPPL1 PE=3 SV=1	-	-	-	-	-
ghi_circ_000353	Gh_D02G0093	RGA1_SOLBU Putative disease resistance protein RGA1 OS=Solanum bulbocastanum GN=RGA1 PE=2 SV=2	-	-	-	GO:0043531//ADP binding;GO:0005515//protein binding	GO:0006952//defense response
ghi_circ_000342	Gh_D01G1284	PP1R7_HUMAN Protein phosphatase 1 regulatory subunit 7 OS=Homo sapiens GN=PPP1R7 PE=1 SV=1	-	-	-	GO:0005515//protein binding	-
ghi_circ_000338	Gh_D01G0335	DRL23_ARATH Putative disease resistance protein At4g10780 OS=Arabidopsis thaliana GN=At4g10780 PE=2 SV=1	-	-	-	GO:0043531//ADP binding	GO:0006952//defense response
ghi_circ_000337	Gh_D01G0335	DRL23_ARATH Putative disease resistance protein At4g10780 OS=Arabidopsis thaliana GN=At4g10780 PE=2 SV=1	-	-	-	GO:0043531//ADP binding	GO:0006952//defense response
ghi_circ_000336	Gh_D01G0335	DRL23_ARATH Putative disease resistance protein At4g10780 OS=Arabidopsis thaliana GN=At4g10780 PE=2 SV=1	-	-	-	GO:0043531//ADP binding	GO:0006952//defense response
ghi_circ_000328	Gh_A13G1798	G3OX3_ARATH Gibberellin 3-beta-dioxygenase 3 OS=Arabidopsis thaliana GN=GA3OX3 PE=2 SV=1	Global and overview maps;Metabolism of terpenoids and polyketides	ko01110//Biosynthesis of secondary metabolites;ko00904//Diterpenoid biosynthesis	-	GO:0016706//oxidoreductase activity, acting on paired donors, with incorporation or reduction of molecular oxygen, 2-oxoglutarate as one donor, and incorporation of one atom each of oxygen into both donors;GO:0016491//oxidoreductase activity	GO:0055114//oxidation-reduction process
ghi_circ_000309	NA
ghi_circ_000292	Gh_A12G0465	-	-	-	-	-	-
ghi_circ_000279	Gh_A11G2805	R13L1_ARATH Putative disease resistance RPP13-like protein 1 OS=Arabidopsis thaliana GN=RPPL1 PE=3 SV=1	-	-	-	-	-
ghi_circ_000278	Gh_A11G2805	R13L1_ARATH Putative disease resistance RPP13-like protein 1 OS=Arabidopsis thaliana GN=RPPL1 PE=3 SV=1	-	-	-	-	-
ghi_circ_000274	Gh_A11G2684	TMVRN_NICGU TMV resistance protein N OS=Nicotiana glutinosa GN=N PE=1 SV=1	-	-	-	GO:0043531//ADP binding;GO:0005515//protein binding	GO:0007165//signal transduction;GO:0006952//defense response
ghi_circ_000268	NA
ghi_circ_000252	Gh_A10G2163	Y38K_CORSE Uncharacterized 38.1 kDa protein OS=Corydalis sempervirens PE=2 SV=1	-	-	-	GO:0003676//nucleic acid binding	-
ghi_circ_000248	NA
ghi_circ_000236	Gh_A10G2024	CUCM1_CUCME Cucumisin OS=Cucumis melo PE=1 SV=1	-	-	-	GO:0004252//serine-type endopeptidase activity;GO:0042802//identical protein binding	GO:0006508//proteolysis;GO:0043086//negative regulation of catalytic activity
ghi_circ_000234	Gh_A10G1948	CSPLE_RICCO CASP-like protein RCOM_1206790 OS=Ricinus communis GN=RCOM_1206790 PE=3 SV=1	-	-	-	-	-
ghi_circ_000219	Gh_A10G1106	ALG11_ARATH GDP-Man:Man(3)GlcNAc(2)-PP-Dol alpha-1,2-mannosyltransferase OS=Arabidopsis thaliana GN=ALG11 PE=1 SV=2	Global and overview maps;Glycan biosynthesis and metabolism	ko01100//Metabolic pathways;ko00510//N-Glycan biosynthesis	-	-	-
ghi_circ_000186	Gh_A08G2236	Y5262_ARATH Ankyrin repeat-containing protein At5g02620 OS=Arabidopsis thaliana GN=At5g02620 PE=1 SV=1	-	-	-	GO:0005515//protein binding	-
ghi_circ_000167	Gh_A08G0219	HSP80_SOLLC Heat shock cognate protein 80 OS=Solanum lycopersicum GN=HSC80 PE=2 SV=1	Folding, sorting and degradation;Environmental adaptation	ko04141//Protein processing in endoplasmic reticulum;ko04626//Plant-pathogen interaction	-	GO:0005524//ATP binding;GO:0051082//unfolded protein binding	GO:0006457//protein folding;GO:0006950//response to stress
ghi_circ_000140	Gh_A06G1591	DNJ10_ARATH Chaperone protein dnaJ 10 OS=Arabidopsis thaliana GN=ATJ10 PE=2 SV=2	Folding, sorting and degradation	ko04141//Protein processing in endoplasmic reticulum	-	-	-
ghi_circ_000137	Gh_A06G1509	CWC21_GIBZE Pre-mRNA-splicing factor CWC21 OS=Gibberella zeae (strain PH-1 / ATCC MYA-4620 / FGSC 9075 / NRRL 31084) GN=CWC21 PE=3 SV=1	-	-	-	-	-
ghi_circ_000124	Gh_A05G3468	NQR_ARATH NADPH:quinone oxidoreductase OS=Arabidopsis thaliana GN=NQR PE=1 SV=1	-	-	-	-	-
ghi_circ_000115	Gh_A05G3458	RBR_RICCO Retinoblastoma-related protein OS=Ricinus communis GN=RBR PE=2 SV=1	-	-	GO:0005634//nucleus	-	GO:0051726//regulation of cell cycle
ghi_circ_000111	Gh_A05G3458	RBR_RICCO Retinoblastoma-related protein OS=Ricinus communis GN=RBR PE=2 SV=1	-	-	GO:0005634//nucleus	-	GO:0051726//regulation of cell cycle
ghi_circ_000110	Gh_A05G3458	RBR_RICCO Retinoblastoma-related protein OS=Ricinus communis GN=RBR PE=2 SV=1	-	-	GO:0005634//nucleus	-	GO:0051726//regulation of cell cycle
ghi_circ_000109	Gh_A05G3362	GH317_ARATH Indole-3-acetic acid-amido synthetase GH3.17 OS=Arabidopsis thaliana GN=GH3.17 PE=1 SV=1	-	-	-	-	-
ghi_circ_000108	Gh_A05G3362	GH317_ARATH Indole-3-acetic acid-amido synthetase GH3.17 OS=Arabidopsis thaliana GN=GH3.17 PE=1 SV=1	-	-	-	-	-
ghi_circ_000107	Gh_A05G3362	GH317_ARATH Indole-3-acetic acid-amido synthetase GH3.17 OS=Arabidopsis thaliana GN=GH3.17 PE=1 SV=1	-	-	-	-	-
ghi_circ_000105	Gh_A05G3343	RLK1_ARATH G-type lectin S-receptor-like serine/threonine-protein kinase RLK1 OS=Arabidopsis thaliana GN=RLK1 PE=2 SV=2	-	-	-	GO:0004713//protein tyrosine kinase activity;GO:0005524//ATP binding;GO:0004674//protein serine/threonine kinase activity;GO:0004672//protein kinase activity	GO:0048544//recognition of pollen;GO:0006468//protein phosphorylation
ghi_circ_000085	NA
ghi_circ_000077	Gh_A04G0224	IDS3_HORVU 2'-deoxymugineic-acid 2'-dioxygenase OS=Hordeum vulgare GN=IDS3 PE=1 SV=3	Global and overview maps;Global and overview maps;Metabolism of terpenoids and polyketides	ko01100//Metabolic pathways;ko01110//Biosynthesis of secondary metabolites;ko00904//Diterpenoid biosynthesis	-	GO:0016706//oxidoreductase activity, acting on paired donors, with incorporation or reduction of molecular oxygen, 2-oxoglutarate as one donor, and incorporation of one atom each of oxygen into both donors;GO:0016491//oxidoreductase activity	GO:0055114//oxidation-reduction process
ghi_circ_000076	Gh_A04G0224	IDS3_HORVU 2'-deoxymugineic-acid 2'-dioxygenase OS=Hordeum vulgare GN=IDS3 PE=1 SV=3	Global and overview maps;Global and overview maps;Metabolism of terpenoids and polyketides	ko01100//Metabolic pathways;ko01110//Biosynthesis of secondary metabolites;ko00904//Diterpenoid biosynthesis	-	GO:0016706//oxidoreductase activity, acting on paired donors, with incorporation or reduction of molecular oxygen, 2-oxoglutarate as one donor, and incorporation of one atom each of oxygen into both donors;GO:0016491//oxidoreductase activity	GO:0055114//oxidation-reduction process
ghi_circ_000072	Gh_A04G0169	-	-	-	-	-	-
ghi_circ_000052	Gh_A03G0247	LGUL_BRAJU Lactoylglutathione lyase OS=Brassica juncea GN=GLY I PE=2 SV=1	Carbohydrate metabolism	ko00620//Pyruvate metabolism	-	GO:0004462//lactoylglutathione lyase activity;GO:0046872//metal ion binding	-
ghi_circ_000044	Gh_A02G1480	Y5241_ARATH Probable receptor-like protein kinase At5g24010 OS=Arabidopsis thaliana GN=At5g24010 PE=1 SV=1	-	-	-	GO:0004713//protein tyrosine kinase activity;GO:0005524//ATP binding;GO:0004674//protein serine/threonine kinase activity;GO:0004672//protein kinase activity	GO:0006468//protein phosphorylation
ghi_circ_000034	Gh_A02G0219	C734A_ARATH Cytochrome P450 734A1 OS=Arabidopsis thaliana GN=CYP734A1 PE=2 SV=1	-	-	-	GO:0009055//electron carrier activity;GO:0020037//heme binding;GO:0016705//oxidoreductase activity, acting on paired donors, with incorporation or reduction of molecular oxygen;GO:0005506//iron ion binding	GO:0055114//oxidation-reduction process
ghi_circ_000030	NA
ghi_circ_000023	Gh_A01G1834	FSTL_FLABI Flavonol sulfotransferase-like OS=Flaveria bidentis PE=2 SV=1	Global and overview maps;Amino acid metabolism;Biosynthesis of other secondary metabolites	ko01110//Biosynthesis of secondary metabolites;ko00380//Tryptophan metabolism;ko00966//Glucosinolate biosynthesis	-	GO:0008146//sulfotransferase activity	-
ghi_circ_000021	Gh_A01G1833	FSTL_FLABI Flavonol sulfotransferase-like OS=Flaveria bidentis PE=2 SV=1	Global and overview maps;Amino acid metabolism;Biosynthesis of other secondary metabolites	ko01110//Biosynthesis of secondary metabolites;ko00380//Tryptophan metabolism;ko00966//Glucosinolate biosynthesis	-	GO:0008146//sulfotransferase activity	-
ghi_circ_000009	Gh_A01G0389	EP1G_DAUCA Epidermis-specific secreted glycoprotein EP1 OS=Daucus carota GN=EP1 PE=1 SV=1	-	-	-	-	-
ghi_circ_000008	Gh_A01G0389	EP1G_DAUCA Epidermis-specific secreted glycoprotein EP1 OS=Daucus carota GN=EP1 PE=1 SV=1	-	-	-	-	-
ghi_circ_000678	Gh_D13G1731	Y381_RICFE Putative ankyrin repeat protein RF_0381 OS=Rickettsia felis (strain ATCC VR-1525 / URRWXCal2) GN=RF_0381 PE=4 SV=1	-	-	-	GO:0005515//protein binding;GO:0005198//structural molecule activity	-
ghi_circ_000666	Gh_D13G0377	-	-	-	-	GO:0009055//electron carrier activity;GO:0005507//copper ion binding	-
ghi_circ_000665	Gh_D13G0150	BCCP_NOSS1 Biotin carboxyl carrier protein of acetyl-CoA carboxylase OS=Nostoc sp. (strain PCC 7120 / UTEX 2576) GN=accB PE=1 SV=2	Global and overview maps;Global and overview maps;Carbohydrate metabolism;Lipid metabolism;Carbohydrate metabolism	ko01100//Metabolic pathways;ko01110//Biosynthesis of secondary metabolites;ko00620//Pyruvate metabolism;ko00061//Fatty acid biosynthesis;ko00640//Propanoate metabolism	-	-	-
ghi_circ_000636	Gh_D11G3108	DRL28_ARATH Probable disease resistance protein At4g27220 OS=Arabidopsis thaliana GN=At4g27220 PE=2 SV=1	-	-	-	GO:0043531//ADP binding;GO:0005515//protein binding;GO:0000166//nucleotide binding;GO:0017111//nucleoside-triphosphatase activity	GO:0006952//defense response
ghi_circ_000632	Gh_D11G3106	-	-	-	-	-	-
ghi_circ_000598	Gh_D10G2263	DRL28_ARATH Probable disease resistance protein At4g27220 OS=Arabidopsis thaliana GN=At4g27220 PE=2 SV=1	-	-	-	GO:0043531//ADP binding	GO:0006952//defense response
ghi_circ_000597	Gh_D10G2263	DRL28_ARATH Probable disease resistance protein At4g27220 OS=Arabidopsis thaliana GN=At4g27220 PE=2 SV=1	-	-	-	GO:0043531//ADP binding	GO:0006952//defense response
ghi_circ_000593	Gh_D10G2262	DRL27_ARATH Disease resistance protein At4g27190 OS=Arabidopsis thaliana GN=At4g27190 PE=2 SV=1	-	-	-	GO:0043531//ADP binding	-
ghi_circ_000575	Gh_D09G2022	-	-	-	-	-	-
ghi_circ_000550	Gh_D09G0037	ERC6L_MOUSE DNA excision repair protein ERCC-6-like OS=Mus musculus GN=Ercc6l PE=1 SV=1	Replication and repair	ko03420//Nucleotide excision repair	-	GO:0003677//DNA binding;GO:0005524//ATP binding;GO:0004386//helicase activity;GO:0003676//nucleic acid binding	-
ghi_circ_000523	Gh_D08G0035	H2A_EUPES Histone H2A OS=Euphorbia esula PE=2 SV=1	-	-	GO:0005634//nucleus;GO:0000786//nucleosome	GO:0003677//DNA binding	GO:0006334//nucleosome assembly
ghi_circ_000518	Gh_D07G1513	SUCB_ARATH Succinyl-CoA ligase [ADP-forming] subunit beta, mitochondrial OS=Arabidopsis thaliana GN=At2g20420 PE=1 SV=1	Global and overview maps;Global and overview maps;Carbohydrate metabolism;Carbohydrate metabolism	ko01100//Metabolic pathways;ko01110//Biosynthesis of secondary metabolites;ko00020//Citrate cycle (TCA cycle);ko00640//Propanoate metabolism	-	GO:0046872//metal ion binding;GO:0005524//ATP binding;GO:0003824//catalytic activity	GO:0008152//metabolic process
ghi_circ_000496	Gh_D06G0205	CENPE_HUMAN Centromere-associated protein E OS=Homo sapiens GN=CENPE PE=1 SV=2	-	-	GO:0005875//microtubule associated complex;GO:0005871//kinesin complex	GO:0005524//ATP binding;GO:0003777//microtubule motor activity;GO:0008017//microtubule binding	GO:0007018//microtubule-based movement
ghi_circ_000480	Gh_D05G3434	MT3_CARPA Metallothionein-like protein type 3 OS=Carica papaya PE=3 SV=1	-	-	-	-	-
ghi_circ_000479	Gh_D05G3434	MT3_CARPA Metallothionein-like protein type 3 OS=Carica papaya PE=3 SV=1	-	-	-	-	-
ghi_circ_000478	Gh_D05G3434	MT3_CARPA Metallothionein-like protein type 3 OS=Carica papaya PE=3 SV=1	-	-	-	-	-
ghi_circ_000477	Gh_D05G3434	MT3_CARPA Metallothionein-like protein type 3 OS=Carica papaya PE=3 SV=1	-	-	-	-	-
ghi_circ_000476	Gh_D05G3434	MT3_CARPA Metallothionein-like protein type 3 OS=Carica papaya PE=3 SV=1	-	-	-	-	-
ghi_circ_000474	Gh_D05G3257	DRL27_ARATH Disease resistance protein At4g27190 OS=Arabidopsis thaliana GN=At4g27190 PE=2 SV=1	-	-	-	GO:0043531//ADP binding	GO:0006952//defense response
ghi_circ_000465	Gh_D05G2355	LAC14_ARATH Laccase-14 OS=Arabidopsis thaliana GN=LAC14 PE=2 SV=1	-	-	-	GO:0005507//copper ion binding;GO:0016491//oxidoreductase activity	GO:0055114//oxidation-reduction process
ghi_circ_000459	Gh_D05G2086	OPT4_ARATH Oligopeptide transporter 4 OS=Arabidopsis thaliana GN=OPT4 PE=2 SV=1	-	-	-	-	GO:0055085//transmembrane transport
ghi_circ_000449	Gh_D05G1184	PDR1_TOBAC Pleiotropic drug resistance protein 1 OS=Nicotiana tabacum GN=PDR1 PE=2 SV=1	-	-	GO:0016020//membrane	GO:0005524//ATP binding;GO:0000166//nucleotide binding;GO:0017111//nucleoside-triphosphatase activity;GO:0016887//ATPase activity	-
ghi_circ_000448	Gh_D05G1182	PDR1_TOBAC Pleiotropic drug resistance protein 1 OS=Nicotiana tabacum GN=PDR1 PE=2 SV=1	-	-	GO:0016020//membrane	GO:0005524//ATP binding;GO:0000166//nucleotide binding;GO:0017111//nucleoside-triphosphatase activity;GO:0016887//ATPase activity	-
ghi_circ_000413	Gh_D04G0588	ODO1_DICDI 2-oxoglutarate dehydrogenase, mitochondrial OS=Dictyostelium discoideum GN=ogdh PE=3 SV=1	Global and overview maps;Global and overview maps;Amino acid metabolism;Carbohydrate metabolism;Amino acid metabolism	ko01100//Metabolic pathways;ko01110//Biosynthesis of secondary metabolites;ko00380//Tryptophan metabolism;ko00020//Citrate cycle (TCA cycle);ko00310//Lysine degradation	-	GO:0004591//oxoglutarate dehydrogenase (succinyl-transferring) activity;GO:0030976//thiamine pyrophosphate binding;GO:0016624//oxidoreductase activity, acting on the aldehyde or oxo group of donors, disulfide as acceptor	GO:0006099//tricarboxylic acid cycle;GO:0008152//metabolic process;GO:0055114//oxidation-reduction process
ghi_circ_000403	Gh_D03G1606	-	-	-	-	-	-
ghi_circ_000402	Gh_D03G1606	-	-	-	-	-	-
ghi_circ_000363	Gh_D02G0236	RLP12_ARATH Receptor-like protein 12 OS=Arabidopsis thaliana GN=RLP12 PE=2 SV=2	-	-	-	GO:0005515//protein binding	-
ghi_circ_000339	Gh_D01G0522	-	-	-	-	-	-
ghi_circ_000335	Gh_D01G0260	Y1133_ARATH G-type lectin S-receptor-like serine/threonine-protein kinase At1g11330 OS=Arabidopsis thaliana GN=At1g11330 PE=1 SV=3	-	-	-	GO:0004713//protein tyrosine kinase activity;GO:0005524//ATP binding;GO:0004674//protein serine/threonine kinase activity;GO:0004672//protein kinase activity	GO:0048544//recognition of pollen;GO:0006468//protein phosphorylation
ghi_circ_000322	Gh_A13G0974	KIF11_DICDI Kinesin-related protein 11 OS=Dictyostelium discoideum GN=kif11 PE=3 SV=1	-	-	GO:0005875//microtubule associated complex;GO:0005871//kinesin complex	GO:0005524//ATP binding;GO:0003777//microtubule motor activity;GO:0008017//microtubule binding	GO:0007018//microtubule-based movement
ghi_circ_000310	Gh_A13G0337	-	-	-	-	GO:0009055//electron carrier activity;GO:0005507//copper ion binding	-
ghi_circ_000308	NA
ghi_circ_000300	NA
ghi_circ_000267	NA
ghi_circ_000240	Gh_A10G2025	CUCM1_CUCME Cucumisin OS=Cucumis melo PE=1 SV=1	-	-	-	GO:0004252//serine-type endopeptidase activity;GO:0042802//identical protein binding	GO:0006508//proteolysis;GO:0043086//negative regulation of catalytic activity
ghi_circ_000239	Gh_A10G2025	CUCM1_CUCME Cucumisin OS=Cucumis melo PE=1 SV=1	-	-	-	GO:0004252//serine-type endopeptidase activity;GO:0042802//identical protein binding	GO:0006508//proteolysis;GO:0043086//negative regulation of catalytic activity
ghi_circ_000238	Gh_A10G2025	CUCM1_CUCME Cucumisin OS=Cucumis melo PE=1 SV=1	-	-	-	GO:0004252//serine-type endopeptidase activity;GO:0042802//identical protein binding	GO:0006508//proteolysis;GO:0043086//negative regulation of catalytic activity
ghi_circ_000237	Gh_A10G2024	CUCM1_CUCME Cucumisin OS=Cucumis melo PE=1 SV=1	-	-	-	GO:0004252//serine-type endopeptidase activity;GO:0042802//identical protein binding	GO:0006508//proteolysis;GO:0043086//negative regulation of catalytic activity
ghi_circ_000211	Gh_A10G0192	ENDO1_ARATH Endonuclease 1 OS=Arabidopsis thaliana GN=ENDO1 PE=1 SV=1	-	-	-	GO:0004519//endonuclease activity;GO:0003676//nucleic acid binding	GO:0006308//DNA catabolic process
ghi_circ_000197	Gh_A09G1053	COMT1_CAPAN Caffeic acid 3-O-methyltransferase OS=Capsicum annuum GN=COMT PE=2 SV=2	Biosynthesis of other secondary metabolites	ko00944//Flavone and flavonol biosynthesis	-	GO:0008171//O-methyltransferase activity;GO:0008168//methyltransferase activity;GO:0046983//protein dimerization activity	-
ghi_circ_000196	Gh_A09G1053	COMT1_CAPAN Caffeic acid 3-O-methyltransferase OS=Capsicum annuum GN=COMT PE=2 SV=2	Biosynthesis of other secondary metabolites	ko00944//Flavone and flavonol biosynthesis	-	GO:0008171//O-methyltransferase activity;GO:0008168//methyltransferase activity;GO:0046983//protein dimerization activity	-
ghi_circ_000185	Gh_A08G1957	F6H1_ARATH Feruloyl CoA ortho-hydroxylase 1 OS=Arabidopsis thaliana GN=F6'H1 PE=1 SV=1	Global and overview maps;Global and overview maps;Biosynthesis of other secondary metabolites	ko01100//Metabolic pathways;ko01110//Biosynthesis of secondary metabolites;ko00941//Flavonoid biosynthesis	-	GO:0016706//oxidoreductase activity, acting on paired donors, with incorporation or reduction of molecular oxygen, 2-oxoglutarate as one donor, and incorporation of one atom each of oxygen into both donors;GO:0016491//oxidoreductase activity	GO:0055114//oxidation-reduction process
ghi_circ_000136	NA
ghi_circ_000112	Gh_A05G3458	RBR_RICCO Retinoblastoma-related protein OS=Ricinus communis GN=RBR PE=2 SV=1	-	-	GO:0005634//nucleus	-	GO:0051726//regulation of cell cycle
ghi_circ_000097	Gh_A05G2112	LAC14_ARATH Laccase-14 OS=Arabidopsis thaliana GN=LAC14 PE=2 SV=1	-	-	-	GO:0005507//copper ion binding;GO:0016491//oxidoreductase activity	GO:0055114//oxidation-reduction process
ghi_circ_000083	NA
ghi_circ_000068	NA
ghi_circ_000057	NA
ghi_circ_000031	Gh_A02G0092	IQD14_ARATH Protein IQ-DOMAIN 14 OS=Arabidopsis thaliana GN=IQD14 PE=1 SV=1	-	-	-	GO:0005515//protein binding	-
ghi_circ_000022	Gh_A01G1833	FSTL_FLABI Flavonol sulfotransferase-like OS=Flaveria bidentis PE=2 SV=1	Global and overview maps;Amino acid metabolism;Biosynthesis of other secondary metabolites	ko01110//Biosynthesis of secondary metabolites;ko00380//Tryptophan metabolism;ko00966//Glucosinolate biosynthesis	-	GO:0008146//sulfotransferase activity	-
ghi_circ_000679	Gh_D13G1830	CYSK_CITLA Cysteine synthase OS=Citrullus lanatus PE=1 SV=1	Global and overview maps;Amino acid metabolism;Energy metabolism	ko01100//Metabolic pathways;ko00270//Cysteine and methionine metabolism;ko00920//Sulfur metabolism	-	-	GO:0006535//cysteine biosynthetic process from serine
ghi_circ_000675	Gh_D13G1489	UBQ10_ARATH Polyubiquitin 10 OS=Arabidopsis thaliana GN=UBQ10 PE=1 SV=2	-	-	-	GO:0005515//protein binding	-
ghi_circ_000667	Gh_D13G0378	-	-	-	-	GO:0009055//electron carrier activity;GO:0005507//copper ion binding	-
ghi_circ_000656	Gh_D12G1013	AROA_ARATH 3-phosphoshikimate 1-carboxyvinyltransferase, chloroplastic OS=Arabidopsis thaliana GN=At2g45300 PE=2 SV=3	Global and overview maps;Global and overview maps;Amino acid metabolism	ko01100//Metabolic pathways;ko01110//Biosynthesis of secondary metabolites;ko00400//Phenylalanine, tyrosine and tryptophan biosynthesis	-	GO:0016765//transferase activity, transferring alkyl or aryl (other than methyl) groups	-
ghi_circ_000638	Gh_D11G3153	R13L1_ARATH Putative disease resistance RPP13-like protein 1 OS=Arabidopsis thaliana GN=RPPL1 PE=3 SV=1	-	-	-	-	-
ghi_circ_000635	Gh_D11G3108	DRL28_ARATH Probable disease resistance protein At4g27220 OS=Arabidopsis thaliana GN=At4g27220 PE=2 SV=1	-	-	-	GO:0043531//ADP binding;GO:0005515//protein binding;GO:0000166//nucleotide binding;GO:0017111//nucleoside-triphosphatase activity	GO:0006952//defense response
ghi_circ_000629	Gh_D11G3103	EIF3E_NEMVE Eukaryotic translation initiation factor 3 subunit E OS=Nematostella vectensis GN=v1g163572 PE=3 SV=1	Translation	ko03013//RNA transport	GO:0005852//eukaryotic translation initiation factor 3 complex;GO:0005737//cytoplasm	GO:0003743//translation initiation factor activity;GO:0005515//protein binding	-
ghi_circ_000611	Gh_D11G0592	ACT7_ARATH Actin-7 OS=Arabidopsis thaliana GN=ACT7 PE=1 SV=1	-	-	-	-	-
ghi_circ_000606	Gh_D10G2422	DRL27_ARATH Disease resistance protein At4g27190 OS=Arabidopsis thaliana GN=At4g27190 PE=2 SV=1	-	-	-	GO:0043531//ADP binding	GO:0006952//defense response
ghi_circ_000601	Gh_D10G2325	RPP8_ARATH Disease resistance protein RPP8 OS=Arabidopsis thaliana GN=RPP8 PE=1 SV=2	-	-	-	GO:0043531//ADP binding	GO:0006952//defense response
ghi_circ_000587	Gh_D10G1540	-	-	-	-	-	-
ghi_circ_000586	Gh_D10G1540	-	-	-	-	-	-
ghi_circ_000584	Gh_D10G1207	FBK50_ARATH F-box/kelch-repeat protein At3g06240 OS=Arabidopsis thaliana GN=At3g06240 PE=2 SV=1	-	-	-	GO:0005515//protein binding	-
ghi_circ_000576	Gh_D09G2023	-	-	-	-	-	-
ghi_circ_000557	Gh_D09G0839	AGO5_ARATH Protein argonaute 5 OS=Arabidopsis thaliana GN=AGO5 PE=1 SV=2	-	-	-	GO:0005515//protein binding	-
ghi_circ_000552	Gh_D09G0231	SNL2_ARATH Paired amphipathic helix protein Sin3-like 2 OS=Arabidopsis thaliana GN=SNL2 PE=1 SV=2	-	-	GO:0005634//nucleus	-	GO:0006355//regulation of transcription, DNA-templated
ghi_circ_000544	Gh_D08G2032	WRK39_ARATH Probable WRKY transcription factor 39 OS=Arabidopsis thaliana GN=WRKY39 PE=2 SV=1	-	-	-	GO:0043565//sequence-specific DNA binding;GO:0003700//sequence-specific DNA binding transcription factor activity	GO:0006355//regulation of transcription, DNA-templated
ghi_circ_000543	Gh_D08G2032	WRK39_ARATH Probable WRKY transcription factor 39 OS=Arabidopsis thaliana GN=WRKY39 PE=2 SV=1	-	-	-	GO:0043565//sequence-specific DNA binding;GO:0003700//sequence-specific DNA binding transcription factor activity	GO:0006355//regulation of transcription, DNA-templated
ghi_circ_000525	Gh_D08G0082	-	-	-	GO:0005746//mitochondrial respiratory chain	GO:0009055//electron carrier activity;GO:0004129//cytochrome-c oxidase activity	-
ghi_circ_000512	Gh_D07G0841	ACCO3_PETHY 1-aminocyclopropane-1-carboxylate oxidase 3 OS=Petunia hybrida GN=ACO3 PE=3 SV=1	Global and overview maps;Global and overview maps;Amino acid metabolism	ko01100//Metabolic pathways;ko01110//Biosynthesis of secondary metabolites;ko00270//Cysteine and methionine metabolism	-	GO:0016706//oxidoreductase activity, acting on paired donors, with incorporation or reduction of molecular oxygen, 2-oxoglutarate as one donor, and incorporation of one atom each of oxygen into both donors;GO:0016491//oxidoreductase activity	GO:0055114//oxidation-reduction process
ghi_circ_000486	Gh_D05G3507	DCS2_GOSAR (+)-delta-cadinene synthase isozyme XC14 OS=Gossypium arboreum PE=2 SV=1	Global and overview maps;Global and overview maps;Metabolism of terpenoids and polyketides	ko01100//Metabolic pathways;ko01110//Biosynthesis of secondary metabolites;ko00902//Monoterpenoid biosynthesis	-	GO:0000287//magnesium ion binding;GO:0016829//lyase activity;GO:0010333//terpene synthase activity	GO:0008152//metabolic process
ghi_circ_000484	Gh_D05G3507	DCS2_GOSAR (+)-delta-cadinene synthase isozyme XC14 OS=Gossypium arboreum PE=2 SV=1	Global and overview maps;Global and overview maps;Metabolism of terpenoids and polyketides	ko01100//Metabolic pathways;ko01110//Biosynthesis of secondary metabolites;ko00902//Monoterpenoid biosynthesis	-	GO:0000287//magnesium ion binding;GO:0016829//lyase activity;GO:0010333//terpene synthase activity	GO:0008152//metabolic process
ghi_circ_000482	Gh_D05G3507	DCS2_GOSAR (+)-delta-cadinene synthase isozyme XC14 OS=Gossypium arboreum PE=2 SV=1	Global and overview maps;Global and overview maps;Metabolism of terpenoids and polyketides	ko01100//Metabolic pathways;ko01110//Biosynthesis of secondary metabolites;ko00902//Monoterpenoid biosynthesis	-	GO:0000287//magnesium ion binding;GO:0016829//lyase activity;GO:0010333//terpene synthase activity	GO:0008152//metabolic process
ghi_circ_000471	Gh_D05G2838	TXLNA_MOUSE Alpha-taxilin OS=Mus musculus GN=Txlna PE=2 SV=1	-	-	-	GO:0019905//syntaxin binding	-
ghi_circ_000469	Gh_D05G2356	LAC9_ORYSJ Putative laccase-9 OS=Oryza sativa subsp. japonica GN=LAC9 PE=2 SV=1	-	-	-	GO:0005507//copper ion binding;GO:0016491//oxidoreductase activity	GO:0055114//oxidation-reduction process
ghi_circ_000466	Gh_D05G2355	LAC14_ARATH Laccase-14 OS=Arabidopsis thaliana GN=LAC14 PE=2 SV=1	-	-	-	GO:0005507//copper ion binding;GO:0016491//oxidoreductase activity	GO:0055114//oxidation-reduction process
ghi_circ_000464	Gh_D05G2356	LAC9_ORYSJ Putative laccase-9 OS=Oryza sativa subsp. japonica GN=LAC9 PE=2 SV=1	-	-	-	GO:0005507//copper ion binding;GO:0016491//oxidoreductase activity	GO:0055114//oxidation-reduction process
ghi_circ_000463	Gh_D05G2354	LAC9_ORYSJ Putative laccase-9 OS=Oryza sativa subsp. japonica GN=LAC9 PE=2 SV=1	-	-	-	GO:0005507//copper ion binding;GO:0016491//oxidoreductase activity	GO:0055114//oxidation-reduction process
ghi_circ_000462	Gh_D05G2354	LAC9_ORYSJ Putative laccase-9 OS=Oryza sativa subsp. japonica GN=LAC9 PE=2 SV=1	-	-	-	GO:0005507//copper ion binding;GO:0016491//oxidoreductase activity	GO:0055114//oxidation-reduction process
ghi_circ_000456	Gh_D05G1184	PDR1_TOBAC Pleiotropic drug resistance protein 1 OS=Nicotiana tabacum GN=PDR1 PE=2 SV=1	-	-	GO:0016020//membrane	GO:0005524//ATP binding;GO:0000166//nucleotide binding;GO:0017111//nucleoside-triphosphatase activity;GO:0016887//ATPase activity	-
ghi_circ_000453	Gh_D05G1184	PDR1_TOBAC Pleiotropic drug resistance protein 1 OS=Nicotiana tabacum GN=PDR1 PE=2 SV=1	-	-	GO:0016020//membrane	GO:0005524//ATP binding;GO:0000166//nucleotide binding;GO:0017111//nucleoside-triphosphatase activity;GO:0016887//ATPase activity	-
ghi_circ_000437	Gh_D05G0079	CESA7_ARATH Cellulose synthase A catalytic subunit 7 [UDP-forming] OS=Arabidopsis thaliana GN=CESA7 PE=1 SV=1	-	-	GO:0016020//membrane	GO:0016760//cellulose synthase (UDP-forming) activity;GO:0005515//protein binding;GO:0008270//zinc ion binding	GO:0030244//cellulose biosynthetic process
ghi_circ_000435	Gh_D05G0079	CESA7_ARATH Cellulose synthase A catalytic subunit 7 [UDP-forming] OS=Arabidopsis thaliana GN=CESA7 PE=1 SV=1	-	-	GO:0016020//membrane	GO:0016760//cellulose synthase (UDP-forming) activity;GO:0005515//protein binding;GO:0008270//zinc ion binding	GO:0030244//cellulose biosynthetic process
ghi_circ_000434	Gh_D05G0079	CESA7_ARATH Cellulose synthase A catalytic subunit 7 [UDP-forming] OS=Arabidopsis thaliana GN=CESA7 PE=1 SV=1	-	-	GO:0016020//membrane	GO:0016760//cellulose synthase (UDP-forming) activity;GO:0005515//protein binding;GO:0008270//zinc ion binding	GO:0030244//cellulose biosynthetic process
ghi_circ_000433	Gh_D05G0080	IF4G1_ARATH Eukaryotic translation initiation factor isoform 4G-1 OS=Arabidopsis thaliana GN=EIF(ISO)4G1 PE=1 SV=1	Translation	ko03013//RNA transport	-	GO:0003723//RNA binding;GO:0003677//DNA binding;GO:0005515//protein binding	-
ghi_circ_000432	Gh_D05G0080	IF4G1_ARATH Eukaryotic translation initiation factor isoform 4G-1 OS=Arabidopsis thaliana GN=EIF(ISO)4G1 PE=1 SV=1	Translation	ko03013//RNA transport	-	GO:0003723//RNA binding;GO:0003677//DNA binding;GO:0005515//protein binding	-
ghi_circ_000431	Gh_D05G0079	CESA7_ARATH Cellulose synthase A catalytic subunit 7 [UDP-forming] OS=Arabidopsis thaliana GN=CESA7 PE=1 SV=1	-	-	GO:0016020//membrane	GO:0016760//cellulose synthase (UDP-forming) activity;GO:0005515//protein binding;GO:0008270//zinc ion binding	GO:0030244//cellulose biosynthetic process
ghi_circ_000430	Gh_D05G0077	CESA1_ARATH Cellulose synthase A catalytic subunit 1 [UDP-forming] OS=Arabidopsis thaliana GN=CESA1 PE=1 SV=1	-	-	GO:0016020//membrane	GO:0016760//cellulose synthase (UDP-forming) activity	GO:0030244//cellulose biosynthetic process
ghi_circ_000429	Gh_D05G0080	IF4G1_ARATH Eukaryotic translation initiation factor isoform 4G-1 OS=Arabidopsis thaliana GN=EIF(ISO)4G1 PE=1 SV=1	Translation	ko03013//RNA transport	-	GO:0003723//RNA binding;GO:0003677//DNA binding;GO:0005515//protein binding	-
ghi_circ_000421	Gh_D04G1458	ML149_PAPSO Major latex protein 149 OS=Papaver somniferum GN=MLP149 PE=2 SV=1	-	-	-	-	GO:0006952//defense response;GO:0009607//response to biotic stimulus
ghi_circ_000419	Gh_D04G1407	HYES_HUMAN Bifunctional epoxide hydrolase 2 OS=Homo sapiens GN=EPHX2 PE=1 SV=2	-	-	-	GO:0003824//catalytic activity	-
ghi_circ_000410	Gh_D04G0255	PP171_ARATH Pentatricopeptide repeat-containing protein At2g26790, mitochondrial OS=Arabidopsis thaliana GN=At2g26790 PE=3 SV=1	-	-	-	-	-
ghi_circ_000409	Gh_D04G0255	PP171_ARATH Pentatricopeptide repeat-containing protein At2g26790, mitochondrial OS=Arabidopsis thaliana GN=At2g26790 PE=3 SV=1	-	-	-	-	-
ghi_circ_000407	Gh_D04G0233	RLK1_ARATH G-type lectin S-receptor-like serine/threonine-protein kinase RLK1 OS=Arabidopsis thaliana GN=RLK1 PE=2 SV=2	-	-	-	GO:0004713//protein tyrosine kinase activity;GO:0005524//ATP binding;GO:0004674//protein serine/threonine kinase activity;GO:0004672//protein kinase activity	GO:0048544//recognition of pollen;GO:0006468//protein phosphorylation
ghi_circ_000392	Gh_D03G1513	C93A2_SOYBN Cytochrome P450 93A2 OS=Glycine max GN=CYP93A2 PE=2 SV=1	Global and overview maps;Global and overview maps;Biosynthesis of other secondary metabolites;Biosynthesis of other secondary metabolites	ko01100//Metabolic pathways;ko01110//Biosynthesis of secondary metabolites;ko00941//Flavonoid biosynthesis;ko00944//Flavone and flavonol biosynthesis	-	GO:0009055//electron carrier activity;GO:0020037//heme binding;GO:0016705//oxidoreductase activity, acting on paired donors, with incorporation or reduction of molecular oxygen;GO:0005506//iron ion binding	GO:0055114//oxidation-reduction process
ghi_circ_000391	NA
ghi_circ_000388	Gh_D03G1322	LGUL_BRAJU Lactoylglutathione lyase OS=Brassica juncea GN=GLY I PE=2 SV=1	Carbohydrate metabolism	ko00620//Pyruvate metabolism	-	GO:0004462//lactoylglutathione lyase activity;GO:0046872//metal ion binding	-
ghi_circ_000387	Gh_D03G1321	LGUL_BRAJU Lactoylglutathione lyase OS=Brassica juncea GN=GLY I PE=2 SV=1	Carbohydrate metabolism	ko00620//Pyruvate metabolism	-	GO:0004462//lactoylglutathione lyase activity;GO:0046872//metal ion binding	-
ghi_circ_000381	Gh_D03G0325	RHIE_DICD3 Rhamnogalacturonate lyase OS=Dickeya dadantii (strain 3937) GN=rhiE PE=1 SV=1	-	-	-	-	-
ghi_circ_000367	NA
ghi_circ_000358	Gh_D02G0094	R13L1_ARATH Putative disease resistance RPP13-like protein 1 OS=Arabidopsis thaliana GN=RPPL1 PE=3 SV=1	-	-	-	-	-
ghi_circ_000356	Gh_D02G0094	R13L1_ARATH Putative disease resistance RPP13-like protein 1 OS=Arabidopsis thaliana GN=RPPL1 PE=3 SV=1	-	-	-	-	-
ghi_circ_000349	Gh_D02G0073	DBR_TOBAC 2-alkenal reductase (NADP(+)-dependent) OS=Nicotiana tabacum GN=DBR PE=1 SV=1	-	-	-	GO:0008270//zinc ion binding;GO:0016491//oxidoreductase activity	GO:0055114//oxidation-reduction process
ghi_circ_000334	Gh_D01G0203	PBS1_ARATH Serine/threonine-protein kinase PBS1 OS=Arabidopsis thaliana GN=PBS1 PE=1 SV=1	-	-	-	GO:0004713//protein tyrosine kinase activity;GO:0005524//ATP binding;GO:0004674//protein serine/threonine kinase activity;GO:0004672//protein kinase activity	GO:0006468//protein phosphorylation
ghi_circ_000326	Gh_A13G1326	DIOX3_PAPSO Codeine O-demethylase OS=Papaver somniferum GN=CODM PE=1 SV=1	Global and overview maps;Global and overview maps;Biosynthesis of other secondary metabolites	ko01100//Metabolic pathways;ko01110//Biosynthesis of secondary metabolites;ko00941//Flavonoid biosynthesis	-	GO:0016706//oxidoreductase activity, acting on paired donors, with incorporation or reduction of molecular oxygen, 2-oxoglutarate as one donor, and incorporation of one atom each of oxygen into both donors;GO:0016491//oxidoreductase activity	GO:0055114//oxidation-reduction process
ghi_circ_000314	Gh_A13G0447	-	-	-	-	-	-
ghi_circ_000311	Gh_A13G0342	CXE12_ARATH Probable carboxylesterase 12 OS=Arabidopsis thaliana GN=CXE12 PE=2 SV=1	-	-	-	GO:0016787//hydrolase activity	GO:0008152//metabolic process
ghi_circ_000307	NA
ghi_circ_000306	Gh_A13G0042	HMGB7_ARATH High mobility group B protein 7 OS=Arabidopsis thaliana GN=HMGB7 PE=1 SV=1	-	-	-	-	-
ghi_circ_000301	Gh_A12G2364	DHSO_ARATH Sorbitol dehydrogenase OS=Arabidopsis thaliana GN=SDH PE=1 SV=1	Global and overview maps;Carbohydrate metabolism	ko01100//Metabolic pathways;ko00051//Fructose and mannose metabolism	-	GO:0008270//zinc ion binding;GO:0016491//oxidoreductase activity	GO:0055114//oxidation-reduction process
ghi_circ_000266	NA
ghi_circ_000261	Gh_A11G0691	-	-	-	-	-	-
ghi_circ_000258	Gh_A11G0556	XTHB_PHAAN Probable xyloglucan endotransglucosylase/hydrolase protein B OS=Phaseolus angularis GN=XTHB PE=2 SV=1	-	-	GO:0048046//apoplast;GO:0005618//cell wall	GO:0016762//xyloglucan:xyloglucosyl transferase activity;GO:0004553//hydrolase activity, hydrolyzing O-glycosyl compounds	GO:0006073//cellular glucan metabolic process;GO:0005975//carbohydrate metabolic process
ghi_circ_000250	Gh_A10G2126	RH38_ARATH DEAD-box ATP-dependent RNA helicase 38 OS=Arabidopsis thaliana GN=RH38 PE=2 SV=2	-	-	-	GO:0005524//ATP binding;GO:0004386//helicase activity;GO:0008026//ATP-dependent helicase activity;GO:0003676//nucleic acid binding	-
ghi_circ_000224	Gh_A10G1580	SEC23_USTMA Protein transport protein SEC23 OS=Ustilago maydis (strain 521 / FGSC 9021) GN=SEC23 PE=3 SV=1	-	-	GO:0030127//COPII vesicle coat	GO:0008270//zinc ion binding	GO:0006886//intracellular protein transport;GO:0006888//ER to Golgi vesicle-mediated transport
ghi_circ_000221	Gh_A10G1332	NLTP2_GOSHI Non-specific lipid-transfer protein OS=Gossypium hirsutum PE=2 SV=1	-	-	-	GO:0008289//lipid binding	GO:0006869//lipid transport
ghi_circ_000218	Gh_A10G1006	-	-	-	-	-	-
ghi_circ_000217	Gh_A10G1006	-	-	-	-	-	-
ghi_circ_000210	Gh_A10G0192	ENDO1_ARATH Endonuclease 1 OS=Arabidopsis thaliana GN=ENDO1 PE=1 SV=1	-	-	-	GO:0004519//endonuclease activity;GO:0003676//nucleic acid binding	GO:0006308//DNA catabolic process
ghi_circ_000203	Gh_A10G0061	RETOL_ARATH Reticuline oxidase-like protein OS=Arabidopsis thaliana GN=At4g20830 PE=1 SV=2	-	-	-	GO:0016614//oxidoreductase activity, acting on CH-OH group of donors;GO:0008762//UDP-N-acetylmuramate dehydrogenase activity;GO:0050660//flavin adenine dinucleotide binding;GO:0003824//catalytic activity;GO:0016491//oxidoreductase activity	GO:0055114//oxidation-reduction process
ghi_circ_000200	NA
ghi_circ_000195	Gh_A09G1053	COMT1_CAPAN Caffeic acid 3-O-methyltransferase OS=Capsicum annuum GN=COMT PE=2 SV=2	Biosynthesis of other secondary metabolites	ko00944//Flavone and flavonol biosynthesis	-	GO:0008171//O-methyltransferase activity;GO:0008168//methyltransferase activity;GO:0046983//protein dimerization activity	-
ghi_circ_000183	Gh_A08G1907	AKR1_SOYBN Probable aldo-keto reductase 1 OS=Glycine max GN=AKR1 PE=2 SV=1	Global and overview maps;Carbohydrate metabolism;Lipid metabolism;Carbohydrate metabolism	ko01100//Metabolic pathways;ko00051//Fructose and mannose metabolism;ko00591//Linoleic acid metabolism;ko00650//Butanoate metabolism	-	GO:0016491//oxidoreductase activity	GO:0055114//oxidation-reduction process
ghi_circ_000170	NA
ghi_circ_000166	Gh_A08G0193	DXS2_ORYSJ Probable 1-deoxy-D-xylulose-5-phosphate synthase 2, chloroplastic OS=Oryza sativa subsp. japonica GN=Os07g0190000 PE=2 SV=1	Global and overview maps;Global and overview maps;Metabolism of terpenoids and polyketides	ko01100//Metabolic pathways;ko01110//Biosynthesis of secondary metabolites;ko00900//Terpenoid backbone biosynthesis	-	GO:0008661//1-deoxy-D-xylulose-5-phosphate synthase activity;GO:0003824//catalytic activity	GO:0008152//metabolic process;GO:0016114//terpenoid biosynthetic process
ghi_circ_000152	NA
ghi_circ_000148	Gh_A07G0468	4CLL9_ARATH 4-coumarate--CoA ligase-like 9 OS=Arabidopsis thaliana GN=4CLL9 PE=1 SV=2	Global and overview maps;Lipid metabolism	ko01100//Metabolic pathways;ko00592//alpha-Linolenic acid metabolism	-	GO:0003824//catalytic activity	GO:0008152//metabolic process
ghi_circ_000099	NA
ghi_circ_000098	Gh_A05G2246	C81E1_GLYEC Isoflavone 2'-hydroxylase OS=Glycyrrhiza echinata GN=CYP81E1 PE=1 SV=2	Global and overview maps;Global and overview maps;Metabolism of terpenoids and polyketides;Biosynthesis of other secondary metabolites	ko01100//Metabolic pathways;ko01110//Biosynthesis of secondary metabolites;ko00903//Limonene and pinene degradation;ko00945//Stilbenoid, diarylheptanoid and gingerol biosynthesis	-	GO:0009055//electron carrier activity;GO:0020037//heme binding;GO:0016705//oxidoreductase activity, acting on paired donors, with incorporation or reduction of molecular oxygen;GO:0005506//iron ion binding	GO:0055114//oxidation-reduction process
ghi_circ_000081	Gh_A04G0311	DCL2_ARATH Endoribonuclease Dicer homolog 2 OS=Arabidopsis thaliana GN=At3g03300 PE=1 SV=2	-	-	-	GO:0003723//RNA binding;GO:0005524//ATP binding;GO:0004525//ribonuclease III activity;GO:0004386//helicase activity;GO:0003725//double-stranded RNA binding;GO:0008026//ATP-dependent helicase activity;GO:0003676//nucleic acid binding;GO:0016891//endoribonuclease activity, producing 5'-phosphomonoesters;GO:0005515//protein binding	GO:0006396//RNA processing
ghi_circ_000051	Gh_A03G0247	LGUL_BRAJU Lactoylglutathione lyase OS=Brassica juncea GN=GLY I PE=2 SV=1	Carbohydrate metabolism	ko00620//Pyruvate metabolism	-	GO:0004462//lactoylglutathione lyase activity;GO:0046872//metal ion binding	-
ghi_circ_000049	Gh_A03G0155	-	-	-	-	-	-
ghi_circ_000048	NA
ghi_circ_000047	Gh_A03G0154	-	-	-	-	-	-
ghi_circ_000042	Gh_A02G1261	EXGA_NEOFI Probable glucan 1,3-beta-glucosidase A OS=Neosartorya fischeri (strain ATCC 1020 / DSM 3700 / FGSC A1164 / NRRL 181) GN=exgA PE=3 SV=1	-	-	-	GO:0051015//actin filament binding;GO:0004553//hydrolase activity, hydrolyzing O-glycosyl compounds;GO:0030674//protein binding, bridging	GO:0005975//carbohydrate metabolic process
ghi_circ_000032	Gh_A02G0212	PPR10_ARATH Pentatricopeptide repeat-containing protein At1g04840 OS=Arabidopsis thaliana GN=PCMP-H64 PE=2 SV=1	-	-	-	-	-
ghi_circ_000020	Gh_A01G1712	DCS3_GOSAR (+)-delta-cadinene synthase isozyme A OS=Gossypium arboreum GN=CAD1-A PE=2 SV=1	Global and overview maps;Global and overview maps;Metabolism of terpenoids and polyketides	ko01100//Metabolic pathways;ko01110//Biosynthesis of secondary metabolites;ko00902//Monoterpenoid biosynthesis	-	GO:0000287//magnesium ion binding;GO:0016829//lyase activity;GO:0010333//terpene synthase activity	GO:0008152//metabolic process
ghi_circ_000019	Gh_A01G1712	DCS3_GOSAR (+)-delta-cadinene synthase isozyme A OS=Gossypium arboreum GN=CAD1-A PE=2 SV=1	Global and overview maps;Global and overview maps;Metabolism of terpenoids and polyketides	ko01100//Metabolic pathways;ko01110//Biosynthesis of secondary metabolites;ko00902//Monoterpenoid biosynthesis	-	GO:0000287//magnesium ion binding;GO:0016829//lyase activity;GO:0010333//terpene synthase activity	GO:0008152//metabolic process
ghi_circ_000018	NA
ghi_circ_000001	Gh_A01G0125	DRL40_ARATH Probable disease resistance protein At5g63020 OS=Arabidopsis thaliana GN=At5g63020 PE=2 SV=2	-	-	-	GO:0043531//ADP binding	GO:0006952//defense response
ghi_circ_000686	Gh_D13G2344	MT1_CICAR Metallothionein-like protein 1 OS=Cicer arietinum PE=3 SV=1	-	-	-	GO:0046872//metal ion binding	-
ghi_circ_000677	Gh_D13G1699	Y3720_ARATH UPF0481 protein At3g47200 OS=Arabidopsis thaliana GN=At3g47200 PE=1 SV=1	-	-	-	-	-	Gh_D13G1699	Y3720_ARATH UPF0481 protein At3g47200 OS=Arabidopsis thaliana GN=At3g47200 PE=1 SV=1	-	-	-	-	-
ghi_circ_000655	NA
ghi_circ_000652	Gh_D12G0467	-	-	-	-	-	-
ghi_circ_000624	Gh_D11G2850	AB3C_ARATH ABC transporter C family member 3 OS=Arabidopsis thaliana GN=ABCC3 PE=1 SV=1	-	-	GO:0016021//integral component of membrane	GO:0005524//ATP binding;GO:0000166//nucleotide binding;GO:0042626//ATPase activity, coupled to transmembrane movement of substances;GO:0017111//nucleoside-triphosphatase activity;GO:0016887//ATPase activity	GO:0006810//transport;GO:0055085//transmembrane transport
ghi_circ_000558	Gh_D09G0839	AGO5_ARATH Protein argonaute 5 OS=Arabidopsis thaliana GN=AGO5 PE=1 SV=2	-	-	-	GO:0005515//protein binding	-
ghi_circ_000526	NA
ghi_circ_000460	Gh_D05G2224	WTR32_ARATH WAT1-related protein At4g08300 OS=Arabidopsis thaliana GN=At4g08300 PE=2 SV=1	-	-	GO:0016020//membrane	-	-
ghi_circ_000438	Gh_D05G0084	CESA1_ARATH Cellulose synthase A catalytic subunit 1 [UDP-forming] OS=Arabidopsis thaliana GN=CESA1 PE=1 SV=1	-	-	GO:0016020//membrane	GO:0016760//cellulose synthase (UDP-forming) activity	GO:0030244//cellulose biosynthetic process
ghi_circ_000423	Gh_D04G1666	6OMT_COPJA (RS)-norcoclaurine 6-O-methyltransferase OS=Coptis japonica PE=1 SV=1	Biosynthesis of other secondary metabolites	ko00944//Flavone and flavonol biosynthesis	-	GO:0008171//O-methyltransferase activity;GO:0008168//methyltransferase activity;GO:0046983//protein dimerization activity	-
ghi_circ_000393	Gh_D03G1513	C93A2_SOYBN Cytochrome P450 93A2 OS=Glycine max GN=CYP93A2 PE=2 SV=1	Global and overview maps;Global and overview maps;Biosynthesis of other secondary metabolites;Biosynthesis of other secondary metabolites	ko01100//Metabolic pathways;ko01110//Biosynthesis of secondary metabolites;ko00941//Flavonoid biosynthesis;ko00944//Flavone and flavonol biosynthesis	-	GO:0009055//electron carrier activity;GO:0020037//heme binding;GO:0016705//oxidoreductase activity, acting on paired donors, with incorporation or reduction of molecular oxygen;GO:0005506//iron ion binding	GO:0055114//oxidation-reduction process
ghi_circ_000263	Gh_A11G1394	-	-	-	-	-	-
ghi_circ_000247	Gh_A10G2073	SNC1_ARATH Protein SUPPRESSOR OF npr1-1, CONSTITUTIVE 1 OS=Arabidopsis thaliana GN=SNC1 PE=1 SV=3	-	-	-	GO:0005515//protein binding	-
ghi_circ_000235	Gh_A10G2023	NAC29_ARATH NAC transcription factor 29 OS=Arabidopsis thaliana GN=NAC029 PE=2 SV=1	-	-	-	GO:0003677//DNA binding	GO:0006355//regulation of transcription, DNA-templated
ghi_circ_000204	Gh_A10G0061	RETOL_ARATH Reticuline oxidase-like protein OS=Arabidopsis thaliana GN=At4g20830 PE=1 SV=2	-	-	-	GO:0016614//oxidoreductase activity, acting on CH-OH group of donors;GO:0008762//UDP-N-acetylmuramate dehydrogenase activity;GO:0050660//flavin adenine dinucleotide binding;GO:0003824//catalytic activity;GO:0016491//oxidoreductase activity	GO:0055114//oxidation-reduction process
ghi_circ_000193	Gh_A09G0740	GOX_SPIOL Peroxisomal (S)-2-hydroxy-acid oxidase OS=Spinacia oleracea PE=1 SV=1	Global and overview maps;Global and overview maps;Carbohydrate metabolism;Transport and catabolism	ko01100//Metabolic pathways;ko01110//Biosynthesis of secondary metabolites;ko00630//Glyoxylate and dicarboxylate metabolism;ko04146//Peroxisome	-	GO:0010181//FMN binding;GO:0016491//oxidoreductase activity	GO:0055114//oxidation-reduction process
ghi_circ_000188	Gh_A09G0199	Y4885_ARATH Probable LRR receptor-like serine/threonine-protein kinase At4g08850 OS=Arabidopsis thaliana GN=At4g08850 PE=1 SV=3	Replication and repair	ko03410//Base excision repair	-	GO:0004713//protein tyrosine kinase activity;GO:0005524//ATP binding;GO:0005515//protein binding;GO:0004672//protein kinase activity	GO:0006468//protein phosphorylation
ghi_circ_000117	Gh_A05G3459	RBR_RICCO Retinoblastoma-related protein OS=Ricinus communis GN=RBR PE=2 SV=1	-	-	GO:0005634//nucleus	-	GO:0051726//regulation of cell cycle
ghi_circ_000116	Gh_A05G3459	RBR_RICCO Retinoblastoma-related protein OS=Ricinus communis GN=RBR PE=2 SV=1	-	-	GO:0005634//nucleus	-	GO:0051726//regulation of cell cycle
ghi_circ_000106	Gh_A05G3350	RLK1_ARATH G-type lectin S-receptor-like serine/threonine-protein kinase RLK1 OS=Arabidopsis thaliana GN=RLK1 PE=2 SV=2	-	-	-	GO:0004713//protein tyrosine kinase activity;GO:0005524//ATP binding;GO:0004672//protein kinase activity	GO:0048544//recognition of pollen;GO:0006468//protein phosphorylation
ghi_circ_000082	Gh_A04G0311	DCL2_ARATH Endoribonuclease Dicer homolog 2 OS=Arabidopsis thaliana GN=At3g03300 PE=1 SV=2	-	-	-	GO:0003723//RNA binding;GO:0005524//ATP binding;GO:0004525//ribonuclease III activity;GO:0004386//helicase activity;GO:0003725//double-stranded RNA binding;GO:0008026//ATP-dependent helicase activity;GO:0003676//nucleic acid binding;GO:0016891//endoribonuclease activity, producing 5'-phosphomonoesters;GO:0005515//protein binding	GO:0006396//RNA processing
ghi_circ_000060	Gh_A03G1169	ATPAM_HELAN ATP synthase subunit alpha, mitochondrial OS=Helianthus annuus GN=ATPA PE=3 SV=1	Global and overview maps;Energy metabolism	ko01100//Metabolic pathways;ko00190//Oxidative phosphorylation	-	-	GO:0046034//ATP metabolic process;GO:0015992//proton transport
ghi_circ_000046	Gh_A03G0154	-	-	-	-	-	-
ghi_circ_000007	Gh_A01G0388	EP1G_DAUCA Epidermis-specific secreted glycoprotein EP1 OS=Daucus carota GN=EP1 PE=1 SV=1	-	-	-	-	-
ghi_circ_000639	Gh_D11G3157	R13L1_ARATH Putative disease resistance RPP13-like protein 1 OS=Arabidopsis thaliana GN=RPPL1 PE=3 SV=1	-	-	-	-	-
ghi_circ_000623	Gh_D11G2672	DRL27_ARATH Disease resistance protein At4g27190 OS=Arabidopsis thaliana GN=At4g27190 PE=2 SV=1	-	-	-	GO:0043531//ADP binding;GO:0000166//nucleotide binding;GO:0017111//nucleoside-triphosphatase activity	GO:0006952//defense response
ghi_circ_000538	NA
ghi_circ_000524	Gh_D08G0082	-	-	-	GO:0005746//mitochondrial respiratory chain	GO:0009055//electron carrier activity;GO:0004129//cytochrome-c oxidase activity	-
ghi_circ_000470	Gh_D05G2834	AROC_ARATH Chorismate synthase, chloroplastic OS=Arabidopsis thaliana GN=EMB1144 PE=2 SV=2	Global and overview maps;Global and overview maps;Amino acid metabolism	ko01100//Metabolic pathways;ko01110//Biosynthesis of secondary metabolites;ko00400//Phenylalanine, tyrosine and tryptophan biosynthesis	-	GO:0004107//chorismate synthase activity	GO:0009073//aromatic amino acid family biosynthetic process
ghi_circ_000442	Gh_D05G0819	R10A1_ARATH 60S ribosomal protein L10a-1 OS=Arabidopsis thaliana GN=RPL10AA PE=2 SV=1	Translation	ko03010//Ribosome	GO:0015934//large ribosomal subunit	GO:0003723//RNA binding;GO:0003735//structural constituent of ribosome	GO:0006412//translation
ghi_circ_000425	Gh_D04G1832	Y5262_ARATH Ankyrin repeat-containing protein At5g02620 OS=Arabidopsis thaliana GN=At5g02620 PE=1 SV=1	-	-	-	GO:0005515//protein binding	-
ghi_circ_000422	Gh_D04G1655	HPXO_KLEP7 FAD-dependent urate hydroxylase OS=Klebsiella pneumoniae subsp. pneumoniae (strain ATCC 700721 / MGH 78578) GN=hpxO PE=1 SV=1	Global and overview maps;Global and overview maps;Metabolism of terpenoids and polyketides	ko01100//Metabolic pathways;ko01110//Biosynthesis of secondary metabolites;ko00906//Carotenoid biosynthesis	-	GO:0016491//oxidoreductase activity	GO:0008152//metabolic process
ghi_circ_000404	Gh_D03G1606	-	-	-	-	-	-
ghi_circ_000228	Gh_A10G1739	BH120_ARATH Transcription factor bHLH120 OS=Arabidopsis thaliana GN=BHLH120 PE=2 SV=2	-	-	-	GO:0046983//protein dimerization activity	-
ghi_circ_000129	Gh_A06G0031	ENPL_CATRO Endoplasmin homolog OS=Catharanthus roseus GN=HSP90 PE=1 SV=1	Folding, sorting and degradation;Environmental adaptation	ko04141//Protein processing in endoplasmic reticulum;ko04626//Plant-pathogen interaction	-	GO:0005524//ATP binding;GO:0051082//unfolded protein binding	GO:0006457//protein folding;GO:0006950//response to stress
ghi_circ_000092	Gh_A05G0673	R10A1_ARATH 60S ribosomal protein L10a-1 OS=Arabidopsis thaliana GN=RPL10AA PE=2 SV=1	Translation	ko03010//Ribosome	GO:0015934//large ribosomal subunit	GO:0003723//RNA binding;GO:0003735//structural constituent of ribosome	GO:0006412//translation
ghi_circ_000062	NA
ghi_circ_000061	NA
ghi_circ_000043	Gh_A02G1359	ITPK1_ARATH Inositol-tetrakisphosphate 1-kinase 1 OS=Arabidopsis thaliana GN=ITPK1 PE=2 SV=1	Global and overview maps;Signal transduction;Carbohydrate metabolism	ko01100//Metabolic pathways;ko04070//Phosphatidylinositol signaling system;ko00562//Inositol phosphate metabolism	GO:0005622//intracellular	GO:0000287//magnesium ion binding;GO:0052725//inositol-1,3,4-trisphosphate 6-kinase activity;GO:0005524//ATP binding;GO:0052726//inositol-1,3,4-trisphosphate 5-kinase activity;GO:0047325//inositol tetrakisphosphate 1-kinase activity	GO:0032957//inositol trisphosphate metabolic process
ghi_circ_000644	Gh_D11G3223	RL40_NICSY Ubiquitin-60S ribosomal protein L40 OS=Nicotiana sylvestris GN=UBICEP52-7 PE=2 SV=2	Translation	ko03010//Ribosome	GO:0005840//ribosome	GO:0005515//protein binding;GO:0003735//structural constituent of ribosome	GO:0006412//translation
ghi_circ_000615	Gh_D11G0765	U83A1_ARATH UDP-glycosyltransferase 83A1 OS=Arabidopsis thaliana GN=UGT83A1 PE=2 SV=1	-	-	-	GO:0016758//transferase activity, transferring hexosyl groups	GO:0008152//metabolic process
ghi_circ_000591	Gh_D10G2218	ASP_THECC 21 kDa seed protein OS=Theobroma cacao GN=ASP PE=2 SV=1	-	-	-	GO:0004866//endopeptidase inhibitor activity	-
ghi_circ_000553	Gh_D09G0231	SNL2_ARATH Paired amphipathic helix protein Sin3-like 2 OS=Arabidopsis thaliana GN=SNL2 PE=1 SV=2	-	-	GO:0005634//nucleus	-	GO:0006355//regulation of transcription, DNA-templated
ghi_circ_000514	Gh_D07G1341	WDR85_MOUSE WD repeat-containing protein 85 OS=Mus musculus GN=Wdr85 PE=2 SV=1	-	-	-	-	-
ghi_circ_000492	Gh_D05G3662	DIR4_ARATH Dirigent protein 4 OS=Arabidopsis thaliana GN=DIR4 PE=2 SV=1	-	-	-	-	-
ghi_circ_000475	Gh_D05G3336	DRL28_ARATH Probable disease resistance protein At4g27220 OS=Arabidopsis thaliana GN=At4g27220 PE=2 SV=1	-	-	-	GO:0043531//ADP binding;GO:0005515//protein binding	GO:0006952//defense response
ghi_circ_000428	Gh_D04G1917	-	-	-	-	-	-
ghi_circ_000401	Gh_D03G1605	-	-	-	-	-	-
ghi_circ_000382	Gh_D03G0370	H33_VITVI Histone H3.3 OS=Vitis vinifera PE=2 SV=3	-	-	GO:0000786//nucleosome	GO:0003677//DNA binding	GO:0006334//nucleosome assembly
ghi_circ_000380	NA
ghi_circ_000375	Gh_D02G0733	ADH1_ARATH Alcohol dehydrogenase class-P OS=Arabidopsis thaliana GN=ADH1 PE=1 SV=2	Global and overview maps;Global and overview maps;Carbohydrate metabolism;Amino acid metabolism;Lipid metabolism	ko01100//Metabolic pathways;ko01110//Biosynthesis of secondary metabolites;ko00010//Glycolysis / Gluconeogenesis;ko00350//Tyrosine metabolism;ko00071//Fatty acid metabolism	-	GO:0008270//zinc ion binding;GO:0016491//oxidoreductase activity	GO:0055114//oxidation-reduction process
ghi_circ_000330	Gh_A13G1829	IPO5_HUMAN Importin-5 OS=Homo sapiens GN=IPO5 PE=1 SV=4	-	-	-	-	-
ghi_circ_000327	Gh_A13G1549	CALR_PRUAR Calreticulin OS=Prunus armeniaca PE=2 SV=1	Folding, sorting and degradation;Transport and catabolism	ko04141//Protein processing in endoplasmic reticulum;ko04145//Phagosome	GO:0005783//endoplasmic reticulum	GO:0051082//unfolded protein binding;GO:0005509//calcium ion binding	GO:0006457//protein folding
ghi_circ_000212	Gh_A10G0501	C71A1_PERAE Cytochrome P450 71A1 OS=Persea americana GN=CYP71A1 PE=1 SV=2	Global and overview maps;Global and overview maps;Biosynthesis of other secondary metabolites;Biosynthesis of other secondary metabolites	ko01100//Metabolic pathways;ko01110//Biosynthesis of secondary metabolites;ko00941//Flavonoid biosynthesis;ko00944//Flavone and flavonol biosynthesis	-	GO:0009055//electron carrier activity;GO:0020037//heme binding;GO:0016705//oxidoreductase activity, acting on paired donors, with incorporation or reduction of molecular oxygen;GO:0005506//iron ion binding	GO:0055114//oxidation-reduction process
ghi_circ_000681	Gh_D13G1929	-	-	-	-	-	-
ghi_circ_000668	Gh_D13G0448	-	-	-	-	-	-
ghi_circ_000663	NA
ghi_circ_000499	Gh_D06G0655	C19L2_HUMAN CWF19-like protein 2 OS=Homo sapiens GN=CWF19L2 PE=1 SV=4	-	-	-	-	-
ghi_circ_000383	Gh_D03G0371	H33_VITVI Histone H3.3 OS=Vitis vinifera PE=2 SV=3	-	-	GO:0000786//nucleosome	GO:0003677//DNA binding	GO:0006334//nucleosome assembly
ghi_circ_000295	Gh_A12G1085	ZDH16_ARATH Protein S-acyltransferase 18 OS=Arabidopsis thaliana GN=PAT18 PE=2 SV=2	-	-	-	GO:0008270//zinc ion binding	-
ghi_circ_000226	Gh_A10G1729	SYEC_SCHPO Probable glutamate--tRNA ligase, cytoplasmic OS=Schizosaccharomyces pombe (strain 972 / ATCC 24843) GN=SPAC17A5.15c PE=1 SV=1	Global and overview maps;Global and overview maps;Translation;Metabolism of cofactors and vitamins	ko01100//Metabolic pathways;ko01110//Biosynthesis of secondary metabolites;ko00970//Aminoacyl-tRNA biosynthesis;ko00860//Porphyrin and chlorophyll metabolism	GO:0005737//cytoplasm	GO:0016876//ligase activity, forming aminoacyl-tRNA and related compounds;GO:0005524//ATP binding;GO:0000166//nucleotide binding;GO:0004812//aminoacyl-tRNA ligase activity	GO:0006418//tRNA aminoacylation for protein translation;GO:0043039//tRNA aminoacylation
ghi_circ_000151	Gh_A07G0780	RNZC_ARATH Ribonuclease Z, chloroplastic OS=Arabidopsis thaliana GN=CPZ PE=2 SV=1	Translation	ko03013//RNA transport	-	-	-
ghi_circ_000145	Gh_A06G1691	HST_ARATH Shikimate O-hydroxycinnamoyltransferase OS=Arabidopsis thaliana GN=HST PE=2 SV=1	-	-	-	GO:0016747//transferase activity, transferring acyl groups other than amino-acyl groups	-
ghi_circ_000096	NA
ghi_circ_000089	Gh_A04G1093	ERG11_ARATH Squalene epoxidase 5 OS=Arabidopsis thaliana GN=SQE5 PE=2 SV=2	Global and overview maps;Global and overview maps;Metabolism of terpenoids and polyketides	ko01100//Metabolic pathways;ko01110//Biosynthesis of secondary metabolites;ko00909//Sesquiterpenoid biosynthesis	GO:0016021//integral component of membrane	GO:0050660//flavin adenine dinucleotide binding;GO:0004506//squalene monooxygenase activity;GO:0016491//oxidoreductase activity	GO:0008152//metabolic process;GO:0055114//oxidation-reduction process
ghi_circ_000088	Gh_A04G1093	ERG11_ARATH Squalene epoxidase 5 OS=Arabidopsis thaliana GN=SQE5 PE=2 SV=2	Global and overview maps;Global and overview maps;Metabolism of terpenoids and polyketides	ko01100//Metabolic pathways;ko01110//Biosynthesis of secondary metabolites;ko00909//Sesquiterpenoid biosynthesis	GO:0016021//integral component of membrane	GO:0050660//flavin adenine dinucleotide binding;GO:0004506//squalene monooxygenase activity;GO:0016491//oxidoreductase activity	GO:0008152//metabolic process;GO:0055114//oxidation-reduction process
ghi_circ_000015	NA
ghi_circ_000530	Gh_D08G0326	ADT1_GOSHI ADP,ATP carrier protein 1, mitochondrial OS=Gossypium hirsutum GN=ANT1 PE=2 SV=1	-	-	GO:0005743//mitochondrial inner membrane	GO:0005215//transporter activity	GO:0006810//transport;GO:0055085//transmembrane transport
ghi_circ_000490	Gh_D05G3571	-	-	-	-	-	-
ghi_circ_000315	Gh_A13G0447	-	-	-	-	-	-
ghi_circ_000285	NA
ghi_circ_000194	Gh_A09G1052	COMT1_CAPAN Caffeic acid 3-O-methyltransferase OS=Capsicum annuum GN=COMT PE=2 SV=2	Biosynthesis of other secondary metabolites	ko00944//Flavone and flavonol biosynthesis	-	GO:0008171//O-methyltransferase activity;GO:0008168//methyltransferase activity;GO:0046983//protein dimerization activity	-
ghi_circ_000126	Gh_A05G3581	UBC19_ARATH Ubiquitin-conjugating enzyme E2 19 OS=Arabidopsis thaliana GN=UBC19 PE=1 SV=1	Folding, sorting and degradation	ko04120//Ubiquitin mediated proteolysis	-	GO:0016881//acid-amino acid ligase activity	-
ghi_circ_000079	Gh_A04G0311	DCL2_ARATH Endoribonuclease Dicer homolog 2 OS=Arabidopsis thaliana GN=At3g03300 PE=1 SV=2	-	-	-	GO:0003723//RNA binding;GO:0005524//ATP binding;GO:0004525//ribonuclease III activity;GO:0004386//helicase activity;GO:0003725//double-stranded RNA binding;GO:0008026//ATP-dependent helicase activity;GO:0003676//nucleic acid binding;GO:0016891//endoribonuclease activity, producing 5'-phosphomonoesters;GO:0005515//protein binding	GO:0006396//RNA processing
ghi_circ_000033	Gh_A02G0212	PPR10_ARATH Pentatricopeptide repeat-containing protein At1g04840 OS=Arabidopsis thaliana GN=PCMP-H64 PE=2 SV=1	-	-	-	-	-
